# Supplementary material for: The Catalase KatA Contributes to Microaerophilic H2O2 Priming to Acquire an Improved Oxidative Stress Resistance in Staphylococcus aureus
Source: MDPI journal article supplement (doi:10.3390/antiox11091793), 2022-09-12
Supplement: s1 [file s1]

**Table S1. Bacterial strains**

| Bacterial strains                                          | Description                                                                                                                               | Reference  |
|------------------------------------------------------------|-------------------------------------------------------------------------------------------------------------------------------------------|------------|
| <b><i>Escherichia coli</i></b>                             |                                                                                                                                           |            |
| DH5α                                                       | F-φ80dlacZ Δ(lacZYA-argF) U169<br>deoRsupE44ΔlacU169<br>(f80lacZDM15) hsdR17 recA1<br>endA1 (rk- mk+) supE44gyrA96 thi-<br>1 gyrA69 relA1 | [1]        |
| <b><i>Staphylococcus aureus</i></b>                        |                                                                                                                                           |            |
| RN4220                                                     | restriction negative strain/MSSA<br>cloning intermediate derived from<br>8325-4                                                           | [2]        |
| COL                                                        | Archaic HA-MRSA strain                                                                                                                    | [3]        |
| COL-Δ <i>katA</i>                                          | COL <i>katA</i> deletion mutant                                                                                                           | [4]        |
| COL-Δ <i>ahpC</i>                                          | COL <i>ahpC</i> deletion mutant                                                                                                           | This study |
| COL-Δ <i>bcp</i>                                           | COL <i>bcp</i> deletion mutant                                                                                                            | This study |
| COL-Δ <i>tpx</i>                                           | COL <i>tpx</i> deletion mutant                                                                                                            | This study |
| COL-Δ <i>perR</i>                                          | COL <i>perR</i> deletion mutant                                                                                                           | This study |
| COL-Δ <i>ahpC</i> Δ <i>katA</i>                            | COL <i>ahpC</i> and <i>katA</i> double<br>deletion mutant                                                                                 | This study |
| COL pRB473- <i>brx-roGFP2</i>                              | COL WT expressing Brx-roGFP2<br>biosensor                                                                                                 | [5]        |
| COL-Δ <i>katA</i> pRB473- <i>brx-roGFP2</i>                | COL <i>katA</i> deletion mutant<br>expressing Brx-roGFP2                                                                                  | This study |
| COL-Δ <i>ahpC</i> pRB473- <i>brx-roGFP2</i>                | COL <i>ahpC</i> deletion mutant<br>expressing Brx-roGFP2                                                                                  | This study |
| COL-Δ <i>bcp</i> pRB473- <i>brx-roGFP2</i>                 | COL <i>bcp</i> deletion mutant<br>expressing Brx-roGFP2                                                                                   | This study |
| COL-Δ <i>ahpC</i> Δ <i>katA</i> -pRB473- <i>brx-roGFP2</i> | COL <i>ahpC</i> and <i>katA</i> deletion<br>mutant expressing Brx-roGFP2                                                                  | This study |
| COL-Δ <i>tpx</i> pRB473- <i>brx-roGFP2</i>                 | COL <i>tpx</i> deletion mutant<br>expressing Brx-roGFP2                                                                                   | This study |
| COL-Δ <i>katA</i> ::pRB473- <i>katA</i>                    | COL <i>katA</i> mutant complemented<br>with pRB473- <i>katA</i>                                                                           | [4]        |
| COL-Δ <i>ahpC</i> ::pRB473- <i>ahpC-His</i>                | COL <i>ahpC</i> mutant complemented<br>with pRB473- <i>ahpC-His</i>                                                                       | This study |
| COL-Δ <i>bcp</i> ::pRB473- <i>bcp-His</i>                  | COL <i>bcp</i> mutant complemented<br>with pRB473- <i>bcp-His</i>                                                                         | This study |
| COL-Δ <i>tpx</i> ::pRB473- <i>tpx-His</i>                  | COL <i>tpx</i> mutant complemented<br>with pRB473- <i>tpx-His</i>                                                                         | This study |
| <b><i>Staphylococcus</i> phage 81</b>                      |                                                                                                                                           | [6]        |

**Table S2. Plasmids**

| Plasmid                       | Description                                                                                                                                                    | Reference  |
|-------------------------------|----------------------------------------------------------------------------------------------------------------------------------------------------------------|------------|
| pRB473-Xyl                    | pRB373-derivative, <i>E. coli</i> / <i>S. aureus</i> shuttle vector, containing xylose-inducible P <sub>Xyl</sub> promoter, Amp <sup>r</sup> , Cm <sup>r</sup> | [7, 8]     |
| pRB473-Xyl- <i>brx-roGFP2</i> | pRB473-derivative expressing <i>brx-roGFP2</i> under P <sub>Xyl</sub>                                                                                          | [5]        |
| pRB473-Xyl- <i>katA</i>       | pRB473-derivative expressing <i>katA</i> under P <sub>Xyl</sub>                                                                                                | [4]        |
| pRB473-Xyl- <i>ahpC-His</i>   | pRB473-derivative expressing His-tagged <i>ahpC</i> under P <sub>Xyl</sub>                                                                                     | This study |
| pRB473-Xyl- <i>bcp-His</i>    | pRB473-derivative expressing His-tagged <i>bcp</i> under P <sub>Xyl</sub>                                                                                      | This study |
| pRB473-Xyl- <i>tpx-His</i>    | pRB473-derivative expressing His-tagged <i>tpx</i> under P <sub>Xyl</sub>                                                                                      | This study |

**Table S3. Oligonucleotide primers**

| Primer name           | Sequence (5' to 3')                                  |
|-----------------------|------------------------------------------------------|
| pMAD-ahpC-for-BglII   | CGCAGATCTCCACTCCTCGATACTTTACAAT                      |
| pMAD-ahpC-f1-rev      | CTACTAAATCTAAACCAGGTTGCTGTAATGGTAAGATTTCTTTG         |
| pMAD-ahpC-f2-for      | CAAAGAAATCTTACCATTACAGCAACCTGGTTTAGATTTAGTAG         |
| pMAD-ahpC-rev-Sall    | CCAGTCGACCATCAATCATAGAATGCGTGAT                      |
| pMAD-bcp-for-BglII    | CGCAGATCTCTTTTAGTATATGCACGTGCAA                      |
| pMAD-bcp-f1-rev       | TGTTTTAAGTTCTTCTATTGTGTGGAAATTGTTCTCCTTTTTGC         |
| pMAD-bcp-f2-for       | GCAAAAAGGAGAACAATTTCCACACAAATAGAAGAACTTAAAAACA       |
| pMAD-bcp-rev-Sall     | CCAGTCGACGCTAACTTCGCAGTTCTAGTA                       |
| pMAD-tpx-for-BglII    | CGCAGATCTACGCACGTTTACTCAATTTACA                      |
| pMAD-tpx-f1-rev       | TTAAATATTTTGTATGCAGCTAAACCTTTGAATGTTATTCAGTCAT       |
| pMAD-tpx-f2-for       | ATGACTGAAATAACATTCAAAGGTTAGCTGCATACAAAAATATTTAA      |
| pMAD-tpx-rev-Sall     | CCAGTCGACCAGGTAACACTTCTTTACAGT                       |
| pMAD-perR-for-BglII   | CGCAGATCTAATCACTTGAAAGCACATTACCA                     |
| pMAD-perR-f1-rev      | TCTTGGCATTCTTTACAAACTCATTGATTCTATTTCAACACTCAT        |
| pMAD-perR-f2-for      | ATGAGTGTTGAAATAGAATCAATGAGTTTGTAAAGAATGCCAAGA        |
| pMAD-perR-rev-Sall    | CCAGTCGACGAATTTCAATAGTCAAATTTACAC                    |
| pRB-ahpC-for-BamHI    | TAGGGATCCATTCTTAGGAGGAAGATATTTATG                    |
| pRB-ahpC-rev-KpnI-His | CTCGGTACCTTAGTGATGGTGATGGTGATGGATTTACCTACTAAATCTAAA  |
| pRB-bcp-for-BamHI     | TAGGGATCCAATGAAGAAAAAGGTGATTATATG                    |
| pRB-bcp-rev-KpnI-His  | CTCGGTACCTCAGTGATGGTGATGGTGATGCCCCAAAATGTTTTAAGTTCTT |
| pRB-tpx-for-BamHI     | TAGGGATCCATGCAGGAGGTCAGTATATGACTGAAATAACATTCAAAG     |
| pRB-tpx-rev-SacI-His  | CTCGAGCTCTTAGTGATGGTGATGGTGATGAATATTTTGTATGCAGC      |
| katA-NB-for           | AAAGGTTCTGGTGCAATTTGG                                |
| katA-NB-rev           | CTAATACGACTCACTATAGGGAGAAATGTGTTCCCTCCACCTTGG        |
| ahpC-NB-for           | TCCTGCTGACTTCTCATTCTG                                |
| ahpC-NB-rev           | CTAATACGACTCACTATAGGGAGAGGTTGCAATGTTTACGCGC          |

Restriction sites are underlined.

## Supplementary References

- [1] Studier, FW, Moffatt, BA. Use of bacteriophage-T7 RNA-polymerase to direct selective high-level expression of cloned genes. *J Mol Biol* 189(1): 113-130, 1986.
- [2] Kreiswirth, BN, Lofdahl, S, Betley, MJ, O'reilly, M, Schlievert, PM, Bergdoll, MS, Novick, RP. The toxic shock syndrome exotoxin structural gene is not detectably transmitted by a prophage. *Nature* 305(5936): 709-712, 1983.
- [3] Shafer, WM, landolo, JJ. Genetics of staphylococcal enterotoxin B in methicillin-resistant isolates of *Staphylococcus aureus*. *Infect. Immun.* 25(3): 902-911, 1979.
- [4] Linzner, N, Fritsch, VN, Busche, T, Tung, QN, Loi, VV, Bernhardt, J, Kalinowski, J, Antelmann, H. The plant-derived naphthoquinone lapachol causes an oxidative stress response in *Staphylococcus aureus*. *Free Radic. Biol. Med.* 158126-136, 2020.
- [5] Loi, VV, Harms, M, Müller, M, Huyen, NTT, Hamilton, CJ, Hochgräfe, F, Pane-Farre, J, Antelmann, H. Real-time imaging of the bacillithiol redox potential in the human pathogen *Staphylococcus aureus* using a genetically encoded bacilliredoxin-fused redox biosensor. *Antioxid. Redox Signal.* 26(15): 835-848, 2017.
- [6] Rosenblum, ED, Tyrone, S. Serology, density, and morphology of staphylococcal phages. *J Bacteriol* 88(6): 1737-1742, 1964.
- [7] Brückner, R, Wagner, E, Götz, F. Characterization of a sucrase gene from *Staphylococcus xylosus*. *J. Bacteriol.* 175(3): 851-857, 1993.
- [8] Pöther, DC, Gierok, P, Harms, M, Mostertz, J, Hochgräfe, F, Antelmann, H, Hamilton, CJ, Borovok, I, Lalk, M, Aharonowitz, Y, Hecker, M. Distribution and infection-related functions of bacillithiol in *Staphylococcus aureus*. *Int. J. Med. Microbiol.* 303(3): 114-123, 2013.

**Table S4. CFU counts for the H<sub>2</sub>O<sub>2</sub> survival assays**

**A)** Average CFU/ml of *S. aureus* COL WT,  $\Delta katA$ ,  $\Delta ahpC$ ,  $\Delta tpx$  and  $\Delta bcp$  mutants and the *ahpC* complemented strain before (0 h) and after 2 and 4 h of exposure to 40 mM H<sub>2</sub>O<sub>2</sub> (The % survival rates are shown in **Fig. 1E**)

| Strains       | CFU/ml                                  |                                         |                                         |
|---------------|-----------------------------------------|-----------------------------------------|-----------------------------------------|
|               | 0 h                                     | 2 h                                     | 4 h                                     |
| WT            | $6.63 \times 10^7 \pm 1.11 \times 10^7$ | $2.12 \times 10^7 \pm 1.75 \times 10^7$ | $5.28 \times 10^6 \pm 8.07 \times 10^5$ |
| $\Delta katA$ | $8.90 \times 10^7 \pm 2.62 \times 10^7$ | 0                                       | 0                                       |
| $\Delta ahpC$ | $7.33 \times 10^7 \pm 1.59 \times 10^7$ | $2.37 \times 10^8 \pm 7.51 \times 10^7$ | $4.87 \times 10^8 \pm 4.53 \times 10^7$ |
| <i>ahpC</i>   | $1.24 \times 10^8 \pm 4.76 \times 10^7$ | $2.89 \times 10^8 \pm 3.76 \times 10^7$ | $3.59 \times 10^8 \pm 1.28 \times 10^8$ |
| $\Delta tpx$  | $2.82 \times 10^7 \pm 2.50 \times 10^7$ | $2.44 \times 10^6 \pm 1.20 \times 10^6$ | $1.65 \times 10^6 \pm 5.51 \times 10^5$ |
| $\Delta bcp$  | $9.57 \times 10^7 \pm 3.57 \times 10^7$ | $3.29 \times 10^7 \pm 4.86 \times 10^6$ | $1.04 \times 10^7 \pm 2.09 \times 10^6$ |

**B)** Average CFU/ml of *S. aureus* COL WT, the  $\Delta katA$  and  $\Delta ahpC\Delta katA$  mutants and the *katA* complemented strain before (0 h) and after 2 and 4 h of exposure to 1 mM H<sub>2</sub>O<sub>2</sub>. (The % survival rates are shown in **Fig. 1F**)

| Strains                  | CFU/ml                                  |                                         |                                         |
|--------------------------|-----------------------------------------|-----------------------------------------|-----------------------------------------|
|                          | 0 h                                     | 2 h                                     | 4 h                                     |
| WT                       | $6.93 \times 10^7 \pm 3.23 \times 10^7$ | $2.17 \times 10^8 \pm 7.46 \times 10^7$ | $4.90 \times 10^8 \pm 1.98 \times 10^8$ |
| $\Delta katA$            | $8.00 \times 10^7 \pm 3.71 \times 10^7$ | $2.35 \times 10^7 \pm 7.41 \times 10^6$ | $3.41 \times 10^6 \pm 1.81 \times 10^6$ |
| <i>katA</i>              | $6.30 \times 10^7 \pm 1.36 \times 10^7$ | $8.43 \times 10^7 \pm 1.09 \times 10^7$ | $2.46 \times 10^8 \pm 3.99 \times 10^7$ |
| $\Delta ahpC\Delta katA$ | $8.87 \times 10^7 \pm 2.71 \times 10^7$ | $9.33 \times 10^6 \pm 1.41 \times 10^6$ | $3.50 \times 10^5 \pm 3.89 \times 10^5$ |

**C)** Average CFU/ml of log and stationary phase cells of *S. aureus* COL WT and the  $\Delta katA$  mutant before (0 h) and after 1 and 2 h of exposure to 40 mM H<sub>2</sub>O<sub>2</sub>. (The % survival rates are shown in **Fig. 1G**)

| Strains            | CFU/ml                                  |                                         |                                         |
|--------------------|-----------------------------------------|-----------------------------------------|-----------------------------------------|
|                    | 0 h                                     | 1 h                                     | 2 h                                     |
| WT log             | $8.93 \times 10^7 \pm 1.16 \times 10^7$ | $5.97 \times 10^7 \pm 1.30 \times 10^7$ | -                                       |
|                    | $6.63 \times 10^7 \pm 1.11 \times 10^7$ | -                                       | $2.12 \times 10^7 \pm 1.75 \times 10^7$ |
| WT stat            | $1.31 \times 10^9 \pm 3.21 \times 10^8$ | $1.40 \times 10^9 \pm 3.36 \times 10^8$ | $1.74 \times 10^9 \pm 2.93 \times 10^8$ |
| $\Delta katA$ log  | $8.90 \times 10^7 \pm 2.62 \times 10^7$ | 0                                       | 0                                       |
| $\Delta katA$ stat | $1.13 \times 10^9 \pm 9.28 \times 10^7$ | $4.03 \times 10^2 \pm 6.35 \times 10^2$ | 0                                       |

**Table S5. CFU counts for microaerophilic H<sub>2</sub>O<sub>2</sub> priming**

**A)** Average CFU/ml of the naïve (C), primed (P), primed and triggered (PT) and triggered (T) *S. aureus* COL WT and the  $\Delta katA$  mutant during the microaerophilic growth before (0 h) and after 2 and 4 h of exposure to 10 mM H<sub>2</sub>O<sub>2</sub>. (The % survival rates are shown in **Fig. 3 D, E**)

|               | CFU/ml                                  |                                         |                                         |
|---------------|-----------------------------------------|-----------------------------------------|-----------------------------------------|
| WT            | 0 h                                     | 2 h                                     | 4 h                                     |
| C             | $2.01 \times 10^8 \pm 2.07 \times 10^7$ | $2.32 \times 10^8 \pm 8.99 \times 10^6$ | $2.29 \times 10^8 \pm 2.06 \times 10^7$ |
| P             | $1.93 \times 10^8 \pm 1.79 \times 10^7$ | $2.25 \times 10^8 \pm 4.33 \times 10^7$ | $2.95 \times 10^8 \pm 1.46 \times 10^7$ |
| PT            | $2.39 \times 10^8 \pm 2.57 \times 10^7$ | $1.25 \times 10^8 \pm 8.52 \times 10^6$ | $1.70 \times 10^8 \pm 3.35 \times 10^7$ |
| T             | $2.16 \times 10^8 \pm 1.32 \times 10^7$ | $1.44 \times 10^5 \pm 5.00 \times 10^4$ | $1.35 \times 10^4 \pm 3.02 \times 10^3$ |
| $\Delta katA$ | 0 h                                     | 2 h                                     | 4 h                                     |
| C             | $2.22 \times 10^8 \pm 1.33 \times 10^7$ | $2.53 \times 10^8 \pm 4.32 \times 10^7$ | $2.42 \times 10^8 \pm 4.23 \times 10^7$ |
| P             | $7.87 \times 10^7 \pm 2.51 \times 10^7$ | $1.12 \times 10^8 \pm 3.34 \times 10^7$ | $8.93 \times 10^7 \pm 1.61 \times 10^7$ |
| PT            | $5.64 \times 10^7 \pm 1.98 \times 10^7$ | $7.50 \times 10^0 \pm 8.29 \times 10^0$ | 0                                       |
| T             | $2.50 \times 10^8 \pm 1.98 \times 10^7$ | $1.50 \times 10^1 \pm 2.06 \times 10^1$ | 0                                       |

**B)** Average CFU/ml of the naïve (C), primed (P), primed and triggered (PT) and triggered (T) *S. aureus* COL *katA* complemented strain during the microaerophilic growth under before (0 h) and after 2 and 4 h of exposure to 10 mM H<sub>2</sub>O<sub>2</sub>. (The % survival rates are shown in **Fig. S4C**)

|             | CFU/ml                                  |                                         |                                         |
|-------------|-----------------------------------------|-----------------------------------------|-----------------------------------------|
| <i>katA</i> | 0 h                                     | 2 h                                     | 4 h                                     |
| C           | $1.58 \times 10^8 \pm 3.06 \times 10^7$ | $1.57 \times 10^8 \pm 6.26 \times 10^6$ | $1.71 \times 10^8 \pm 3.52 \times 10^7$ |
| P           | $1.63 \times 10^8 \pm 2.12 \times 10^7$ | $1.55 \times 10^8 \pm 2.35 \times 10^7$ | $1.92 \times 10^8 \pm 4.22 \times 10^7$ |
| PT          | $1.70 \times 10^8 \pm 2.27 \times 10^7$ | $4.91 \times 10^3 \pm 3.12 \times 10^3$ | $4.24 \times 10^2 \pm 2.87 \times 10^2$ |
| T           | $1.59 \times 10^8 \pm 2.90 \times 10^7$ | $1.75 \times 10^3 \pm 9.17 \times 10^2$ | $4.20 \times 10^2 \pm 3.35 \times 10^2$ |

**Table S6. CFU counts for aerobic H<sub>2</sub>O<sub>2</sub> priming**

**A)** Average CFU/ml of the naïve (C), primed (P), primed and triggered (PT) and triggered (T) *S. aureus* COL WT during the aerobic growth before (0 h) and after 2 and 4 h of exposure to 10 mM H<sub>2</sub>O<sub>2</sub>. (The % survival rates are shown in **Fig. 4C**)

|    | CFU/ml                                  |                                         |                                         |
|----|-----------------------------------------|-----------------------------------------|-----------------------------------------|
| WT | 0 h                                     | 2 h                                     | 4 h                                     |
| C  | $6.01 \times 10^7 \pm 6.12 \times 10^6$ | $3.45 \times 10^8 \pm 1.83 \times 10^7$ | $1.04 \times 10^9 \pm 2.98 \times 10^8$ |
| P  | $5.31 \times 10^7 \pm 1.49 \times 10^7$ | $3.02 \times 10^8 \pm 7.17 \times 10^7$ | $1.01 \times 10^9 \pm 3.15 \times 10^8$ |
| PT | $5.31 \times 10^7 \pm 1.49 \times 10^7$ | $4.32 \times 10^7 \pm 2.23 \times 10^7$ | $1.03 \times 10^8 \pm 4.44 \times 10^7$ |
| T  | $6.01 \times 10^7 \pm 6.12 \times 10^6$ | $3.60 \times 10^7 \pm 1.34 \times 10^7$ | $7.68 \times 10^7 \pm 4.19 \times 10^7$ |

**B)** Average CFU/ml of the naïve (C), primed (P), primed and triggered (PT) and triggered (T) *S. aureus* COL WT during the aerobic growth before (0 h) and after 2 and 4 h of exposure to 40 mM H<sub>2</sub>O<sub>2</sub>. (The % survival rates are shown in **Fig. 4F**)

|    | CFU/ml                                  |                                         |                                         |
|----|-----------------------------------------|-----------------------------------------|-----------------------------------------|
| WT | 0 h                                     | 2 h                                     | 4 h                                     |
| C  | $6.08 \times 10^7 \pm 4.01 \times 10^6$ | $4.46 \times 10^8 \pm 1.45 \times 10^8$ | $9.17 \times 10^8 \pm 2.08 \times 10^8$ |
| P  | $5.44 \times 10^7 \pm 9.86 \times 10^6$ | $2.03 \times 10^8 \pm 3.29 \times 10^7$ | $5.35 \times 10^8 \pm 1.21 \times 10^8$ |
| PT | $5.44 \times 10^7 \pm 9.86 \times 10^6$ | $4.58 \times 10^6 \pm 1.93 \times 10^6$ | $5.74 \times 10^5 \pm 5.09 \times 10^5$ |
| T  | $6.08 \times 10^7 \pm 4.01 \times 10^6$ | $6.99 \times 10^6 \pm 2.95 \times 10^6$ | $3.18 \times 10^6 \pm 1.01 \times 10^6$ |

**Table S7. CFU counts for the CHP survival assays**

Average CFU/ml of the *S. aureus* COL WT, the  $\Delta katA$ ,  $\Delta ahpC$ ,  $\Delta tpx$  and  $\Delta bcp$  mutants and complemented strains before (0 h) and after 2 and 4 h of exposure to 40 mM H<sub>2</sub>O<sub>2</sub>.

(The % survival rates are shown in **Fig. 6G, H**)

| Strains       | CFU/ml                                  |                                         |                                         |
|---------------|-----------------------------------------|-----------------------------------------|-----------------------------------------|
|               | 0 h                                     | 2 h                                     | 4 h                                     |
| COL WT        | $6.70 \times 10^7 \pm 1.98 \times 10^7$ | $2.46 \times 10^7 \pm 1.12 \times 10^7$ | $2.95 \times 10^7 \pm 1.54 \times 10^7$ |
| $\Delta katA$ | $1.23 \times 10^8 \pm 5.19 \times 10^7$ | $1.48 \times 10^8 \pm 2.52 \times 10^7$ | $1.65 \times 10^8 \pm 8.26 \times 10^7$ |
| $\Delta ahpC$ | $6.87 \times 10^7 \pm 1.92 \times 10^7$ | $2.37 \times 10^7 \pm 6.87 \times 10^6$ | $5.95 \times 10^6 \pm 3.93 \times 10^6$ |
| $\Delta tpx$  | $2.30 \times 10^7 \pm 2.32 \times 10^7$ | $5.30 \times 10^6 \pm 3.70 \times 10^6$ | $2.31 \times 10^6 \pm 1.77 \times 10^6$ |
| $\Delta bcp$  | $7.37 \times 10^7 \pm 1.14 \times 10^7$ | $1.72 \times 10^7 \pm 6.26 \times 10^6$ | $7.62 \times 10^6 \pm 6.08 \times 10^6$ |
| <i>katA</i>   | $9.83 \times 10^7 \pm 6.04 \times 10^7$ | $9.46 \times 10^7 \pm 5.27 \times 10^7$ | $8.77 \times 10^7 \pm 4.71 \times 10^7$ |
| <i>ahpC</i>   | $1.32 \times 10^8 \pm 1.47 \times 10^7$ | $6.97 \times 10^7 \pm 4.60 \times 10^7$ | $4.40 \times 10^7 \pm 1.27 \times 10^7$ |
| <i>tpx</i>    | $9.65 \times 10^7 \pm 2.35 \times 10^7$ | $3.42 \times 10^7 \pm 2.05 \times 10^7$ | $4.23 \times 10^7 \pm 2.04 \times 10^7$ |
| <i>bcp</i>    | $1.14 \times 10^8 \pm 2.95 \times 10^7$ | $4.22 \times 10^7 \pm 1.73 \times 10^7$ | $3.71 \times 10^7 \pm 8.71 \times 10^6$ |

**Table S8. CFU counts for HOCl survival assays**

Average CFUs/ml of the *S. aureus* COL WT and  $\Delta katA$ ,  $\Delta ahpC$ ,  $\Delta tpx$  and  $\Delta bcp$  mutant strains before (0 h) and after 2 and 4 h of exposure to 2.5 mM HOCl.

(The % survival rates are shown in **Fig. S5E**)

| Strains       | CFU/ml                                  |                                         |                                         |
|---------------|-----------------------------------------|-----------------------------------------|-----------------------------------------|
|               | 0 h                                     | 2 h                                     | 4 h                                     |
| COL WT        | $7.84 \times 10^7 \pm 1.39 \times 10^7$ | $3.93 \times 10^7 \pm 1.05 \times 10^7$ | $1.26 \times 10^7 \pm 2.69 \times 10^6$ |
| $\Delta katA$ | $1.14 \times 10^8 \pm 5.24 \times 10^7$ | $5.75 \times 10^7 \pm 3.78 \times 10^7$ | $1.92 \times 10^7 \pm 1.36 \times 10^7$ |
| $\Delta ahpC$ | $7.23 \times 10^7 \pm 1.45 \times 10^7$ | $2.71 \times 10^7 \pm 5.98 \times 10^6$ | $1.45 \times 10^7 \pm 1.54 \times 10^6$ |
| $\Delta tpx$  | $3.41 \times 10^7 \pm 2.52 \times 10^7$ | $1.47 \times 10^7 \pm 1.05 \times 10^7$ | $6.94 \times 10^6 \pm 8.04 \times 10^6$ |
| $\Delta bcp$  | $1.00 \times 10^8 \pm 2.76 \times 10^7$ | $3.75 \times 10^7 \pm 1.49 \times 10^7$ | $2.70 \times 10^7 \pm 1.08 \times 10^7$ |

# Fig. S1

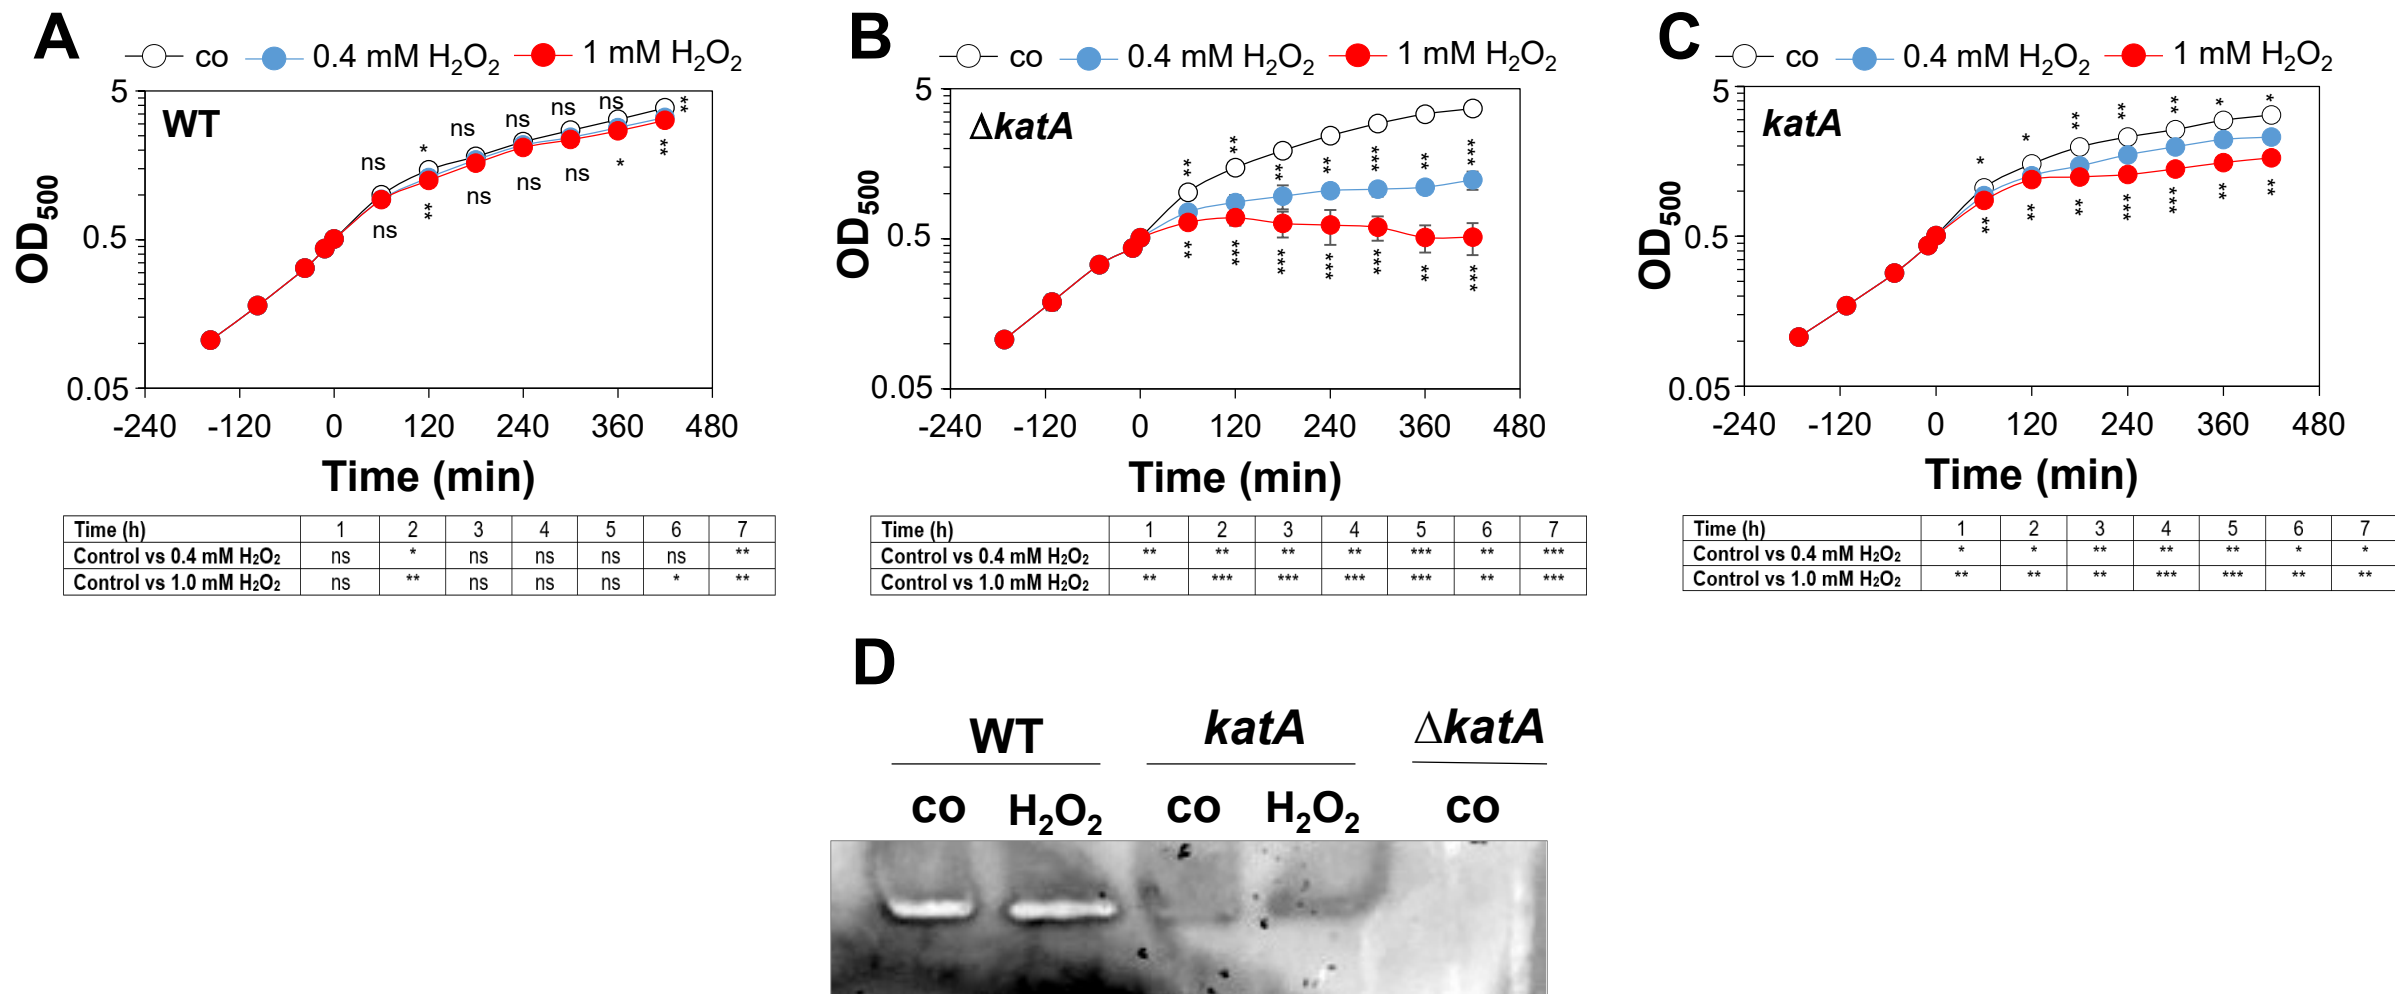

**Fig. S1. Complementation of KatA increases the H<sub>2</sub>O<sub>2</sub> resistance in *S. aureus* (A-C), but the catalase activity in the *katA* complemented strain is lower compared to the WT (D).** Growth curves of the *S. aureus* COL WT (A), the  $\Delta katA$  mutant (B) and the *katA* complemented strain (C) after exposure to 0.4 and 1 mM H<sub>2</sub>O<sub>2</sub> stress at an OD<sub>500</sub> of 0.5. Mean values and SD of four biological replicates are presented. (D) Catalase staining of aerobically grown *S. aureus* COL WT, the  $\Delta katA$  mutant and the *katA* complemented strain before (co) and after exposure to 100  $\mu$ M H<sub>2</sub>O<sub>2</sub> at an OD<sub>500</sub> of 0.5. Protein extracts were separated by native PAGE and the catalase activity was determined using diamidobenzidine staining as described in the Methods. The statistics is shown below the graphs and was calculated using the Student's unpaired two-tailed t-test by the graph prism software for co vs. 0.4 mM and co vs. 1 mM H<sub>2</sub>O<sub>2</sub>. Symbols are <sup>ns</sup>p > 0.05, \*p ≤ 0.05, \*\*p ≤ 0.01 and \*\*\*p ≤ 0.001.

Fig. S2

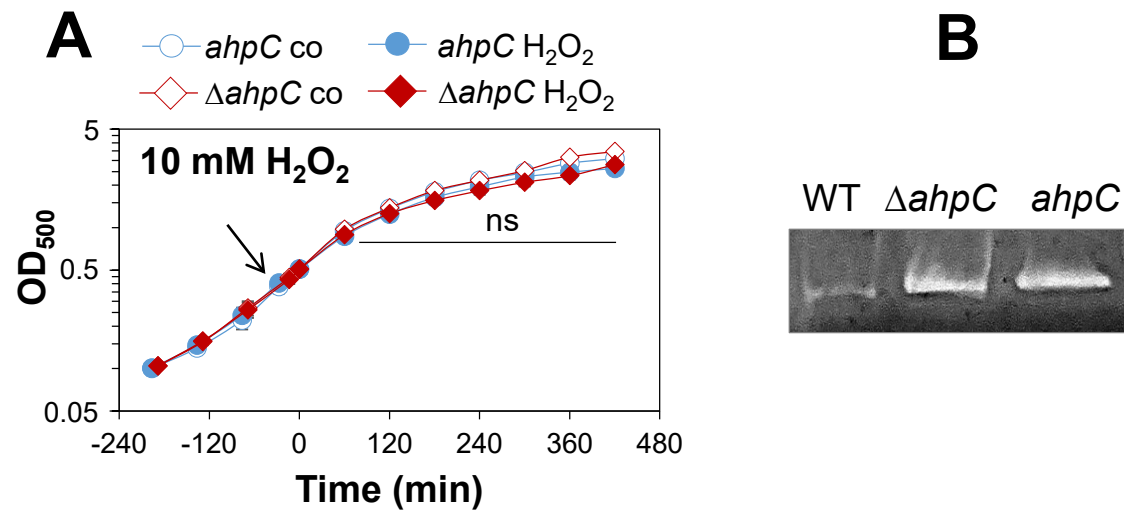

**Fig. S2. Growth and catalase activity of the *ahpC* complemented strain.** (A) Growth curves of *S. aureus* COL  $\Delta$ *ahpC* mutant and *ahpC* complemented strains in RPMI medium before (co) and after exposure to 10 mM H<sub>2</sub>O<sub>2</sub> (A). Mean values and SD of 4 biological replicates are presented. The statistics was determined using a Student's unpaired two-tailed t-test by graph prism. Symbols are: <sup>ns</sup>p > 0.05 (B) Catalase staining shows higher catalase activity in the  $\Delta$ *ahpC* mutant and *ahpC* complemented strain compared to the WT at control conditions.



**Fig. S3**

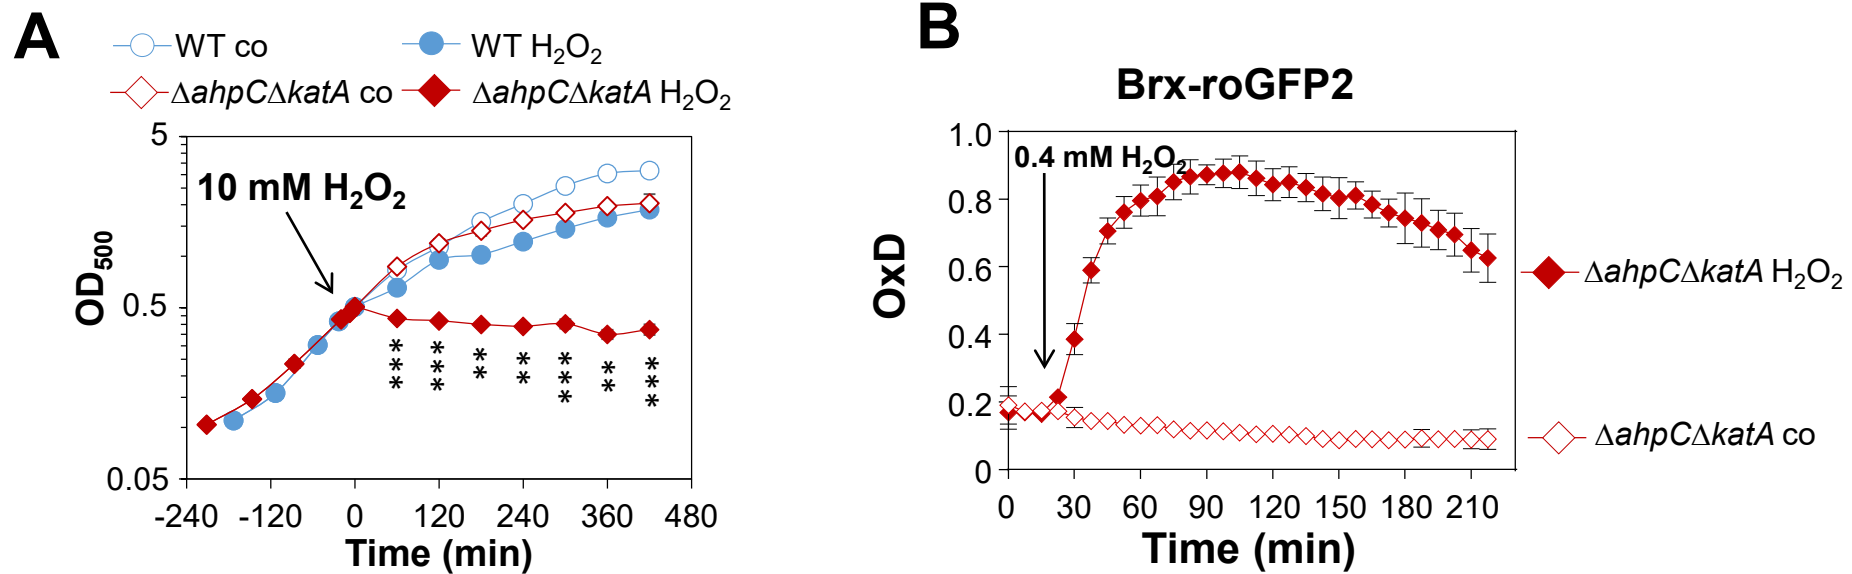

**Fig. S3. The  $\Delta katA$   $ahpC$  double mutant is hypersensitive towards H<sub>2</sub>O<sub>2</sub> and delayed in recovery of the  $E_{BSH}$  after 0.4 mM H<sub>2</sub>O<sub>2</sub>** (A) Growth curves of *S. aureus* COL WT and the  $\Delta ahpC\Delta katA$  double mutant in RPMI medium before (co) and after exposure to 10 mM H<sub>2</sub>O<sub>2</sub> at an OD<sub>500</sub> of 0.5. The survival rates were calculated relative to the untreated control, which was set to 100%. Mean values and SD of 3-4 biological replicates are shown. The statistics was calculated using the Student's unpaired two-tailed t-test by the graph prism software. Symbols are \*p ≤ 0.05, \*\*p ≤ 0.01 and \*\*\*p ≤ 0.001. (B) The Brx-roGFP2 biosensor in the *S. aureus* COL  $\Delta ahpC\Delta katA$  double mutant showed a fast oxidation and a delay in recovery of the reduced  $E_{BSH}$  after 0.4 mM H<sub>2</sub>O<sub>2</sub>. The oxidation degree (OxD) of the Brx-roGFP2 response was calculated based on the 405/488 nm excitation ratios and normalized to fully reduced and oxidized controls. Mean values and SD of the OxD values are presented from 3 biological replicates.

Fig. S4

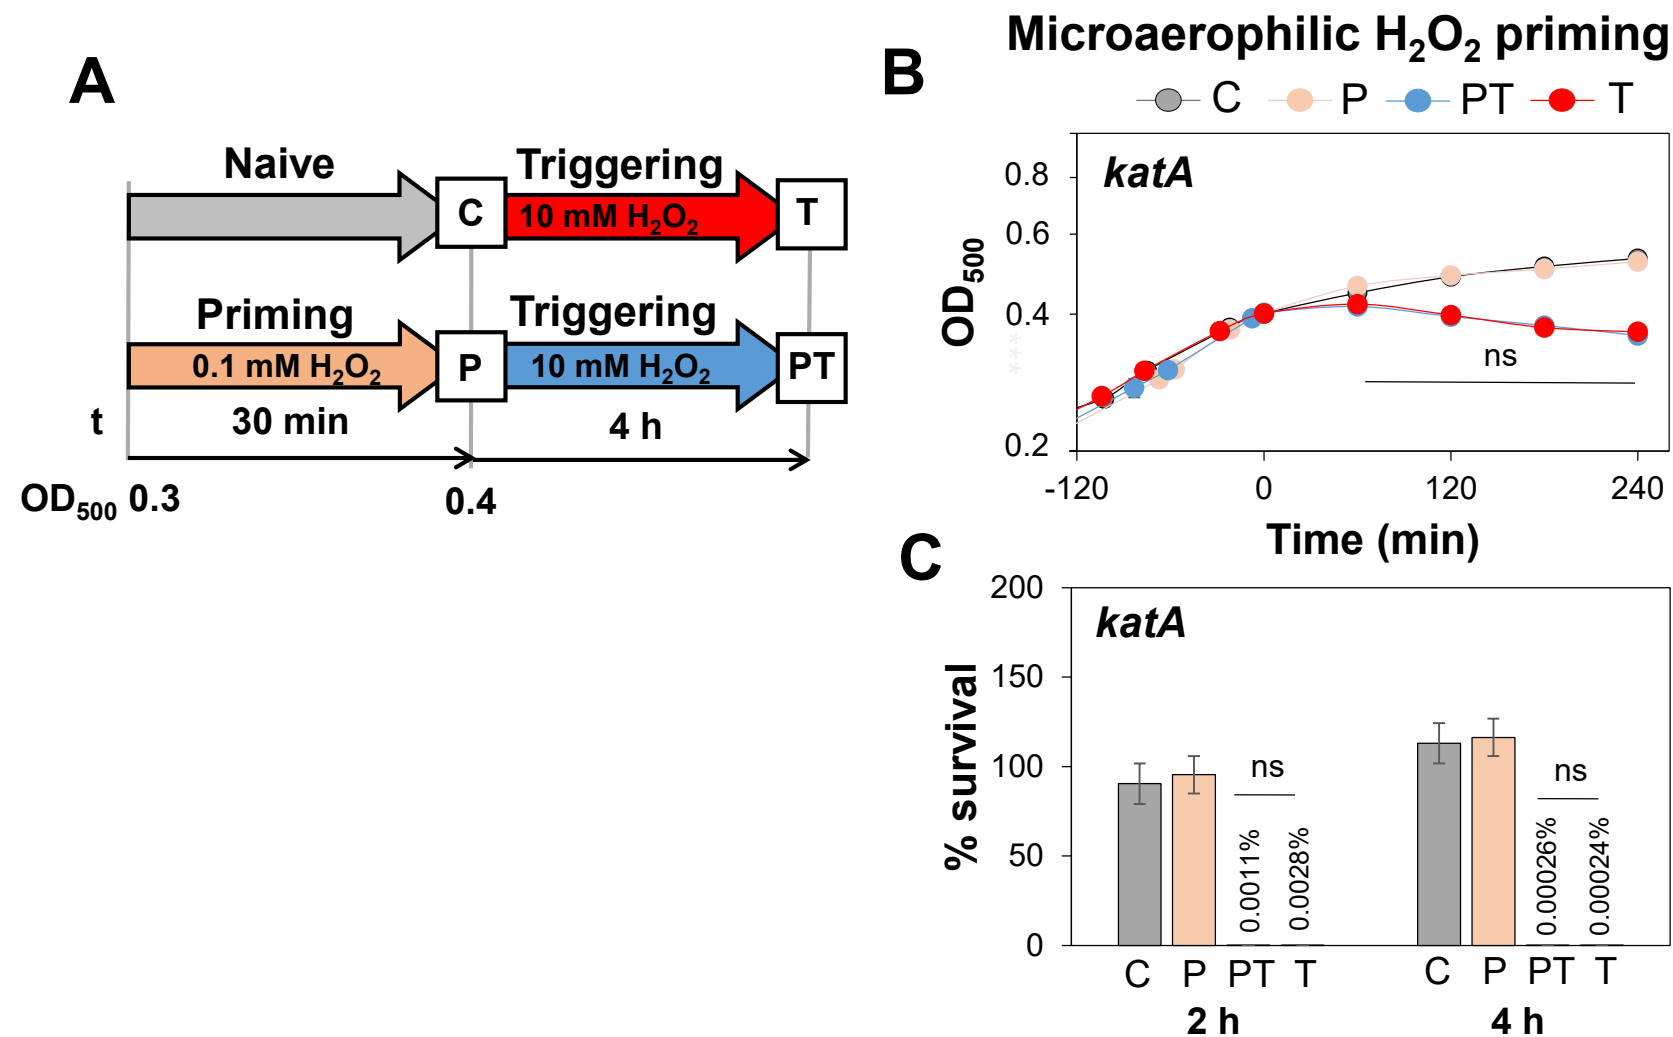

**Fig. S4. The *katA* complemented strain is not primable towards increased  $\text{H}_2\text{O}_2$  resistance during the microaerophilic growth.** (A) Setup for microaerophilic priming and triggering experiments. The *S. aureus katA* complemented strain was primed during the log phase with 0.1 mM  $\text{H}_2\text{O}_2$  for ~30 min (P) and subsequently treated with 10 mM  $\text{H}_2\text{O}_2$  as triggering stimulus (PT). The growth curves (B) and survival rates (C) were determined in naïve (C), primed (P), primed and triggered (PT) and triggered cells (T). The survival rates were calculated after 2 and 4 h of  $\text{H}_2\text{O}_2$  stress relative to untreated control cells. The results are from 3-4 biological replicates. Error bars represent the SD. The statistics was determined using a Student's unpaired two-tailed t-test by graph prism. Symbols are: ns  $p > 0.05$ .

Fig. S5

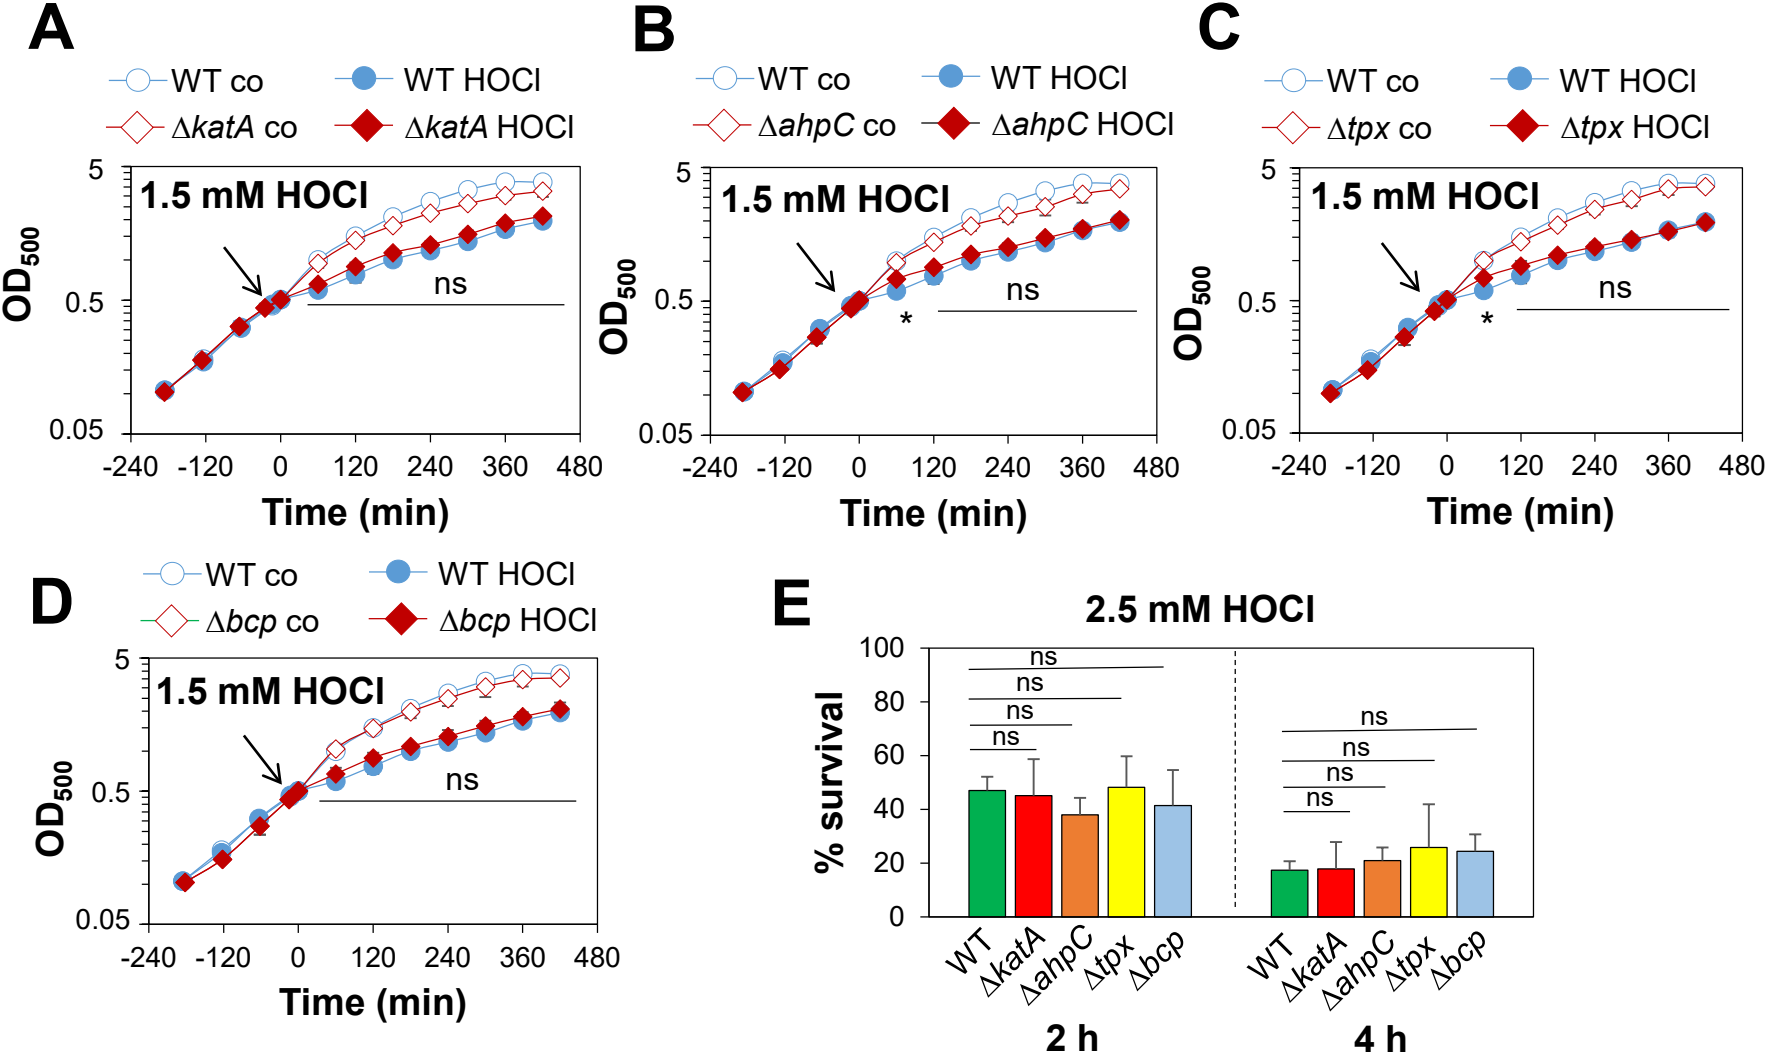

**Fig. S5. KatA and the peroxiredoxins AhpC, Tpx and Bcp are not involved in HOCI detoxification in *S. aureus*.** (A-C) Growth curves of *S. aureus* COL WT,  $\Delta katA$  (A),  $\Delta ahpC$  (B),  $\Delta tpx$  (C) and  $\Delta bcp$  mutants (D) in RPMI medium before (co) and after exposure to 1.5 mM HOCI stress during the log phase. (D) Survival rates were determined as CFUs of *S. aureus* COL WT,  $\Delta katA$ ,  $\Delta ahpC$ ,  $\Delta tpx$  and  $\Delta bcp$  mutants at 2 and 4 h after treatment with 2.5 mM HOCI. Survival of the untreated control was set to 100%. Mean values and SD of 4-5 biological replicates are presented. The statistics was determined using a Student's unpaired two-tailed t-test by graph prism. Symbols are: <sup>ns</sup> $p > 0.05$ , <sup>\*</sup> $p \leq 0.05$

**Fig. S6**

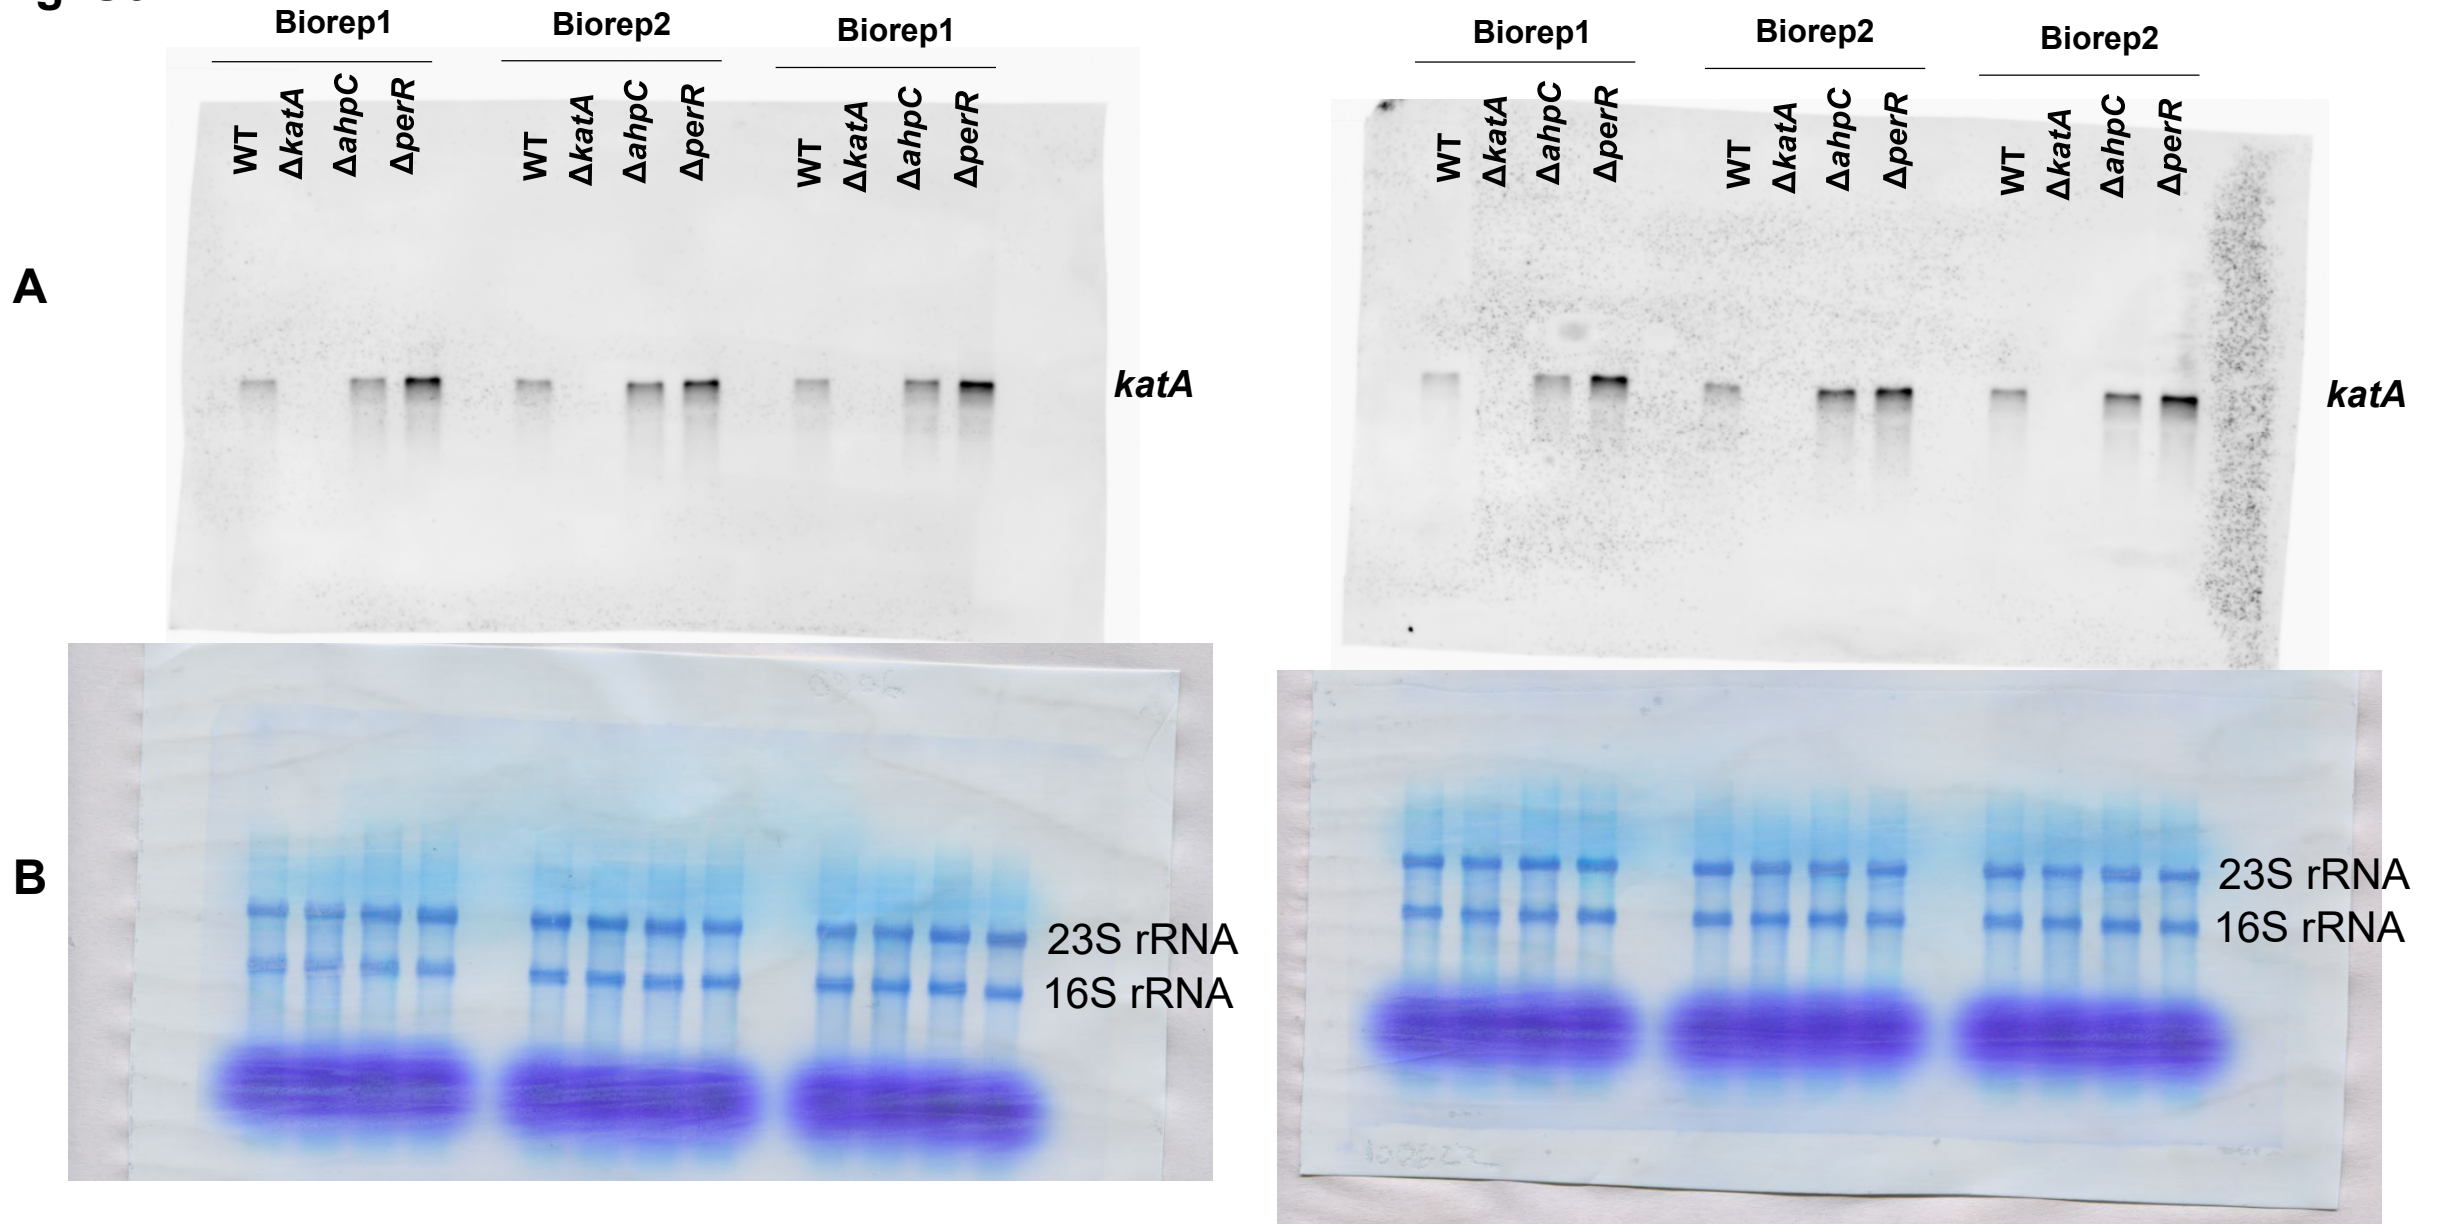

**Fig. S6. A)** The Northern blot images using the *katA* specific RNA probe show the *katA* transcripts (images of Fig. 1H, 2 bioreplicates, 3 technical replicates). **B)** The methylene blue stain of the Northern blots used as loading control for total RNA (images of Fig. 1H, 2 bioreplicates, 3 technical replicates). Labelling of RNA samples is as above for the detection of the *katA* transcript. The bands for the 16S and 23S rRNAs are indicated.

**Fig. S7**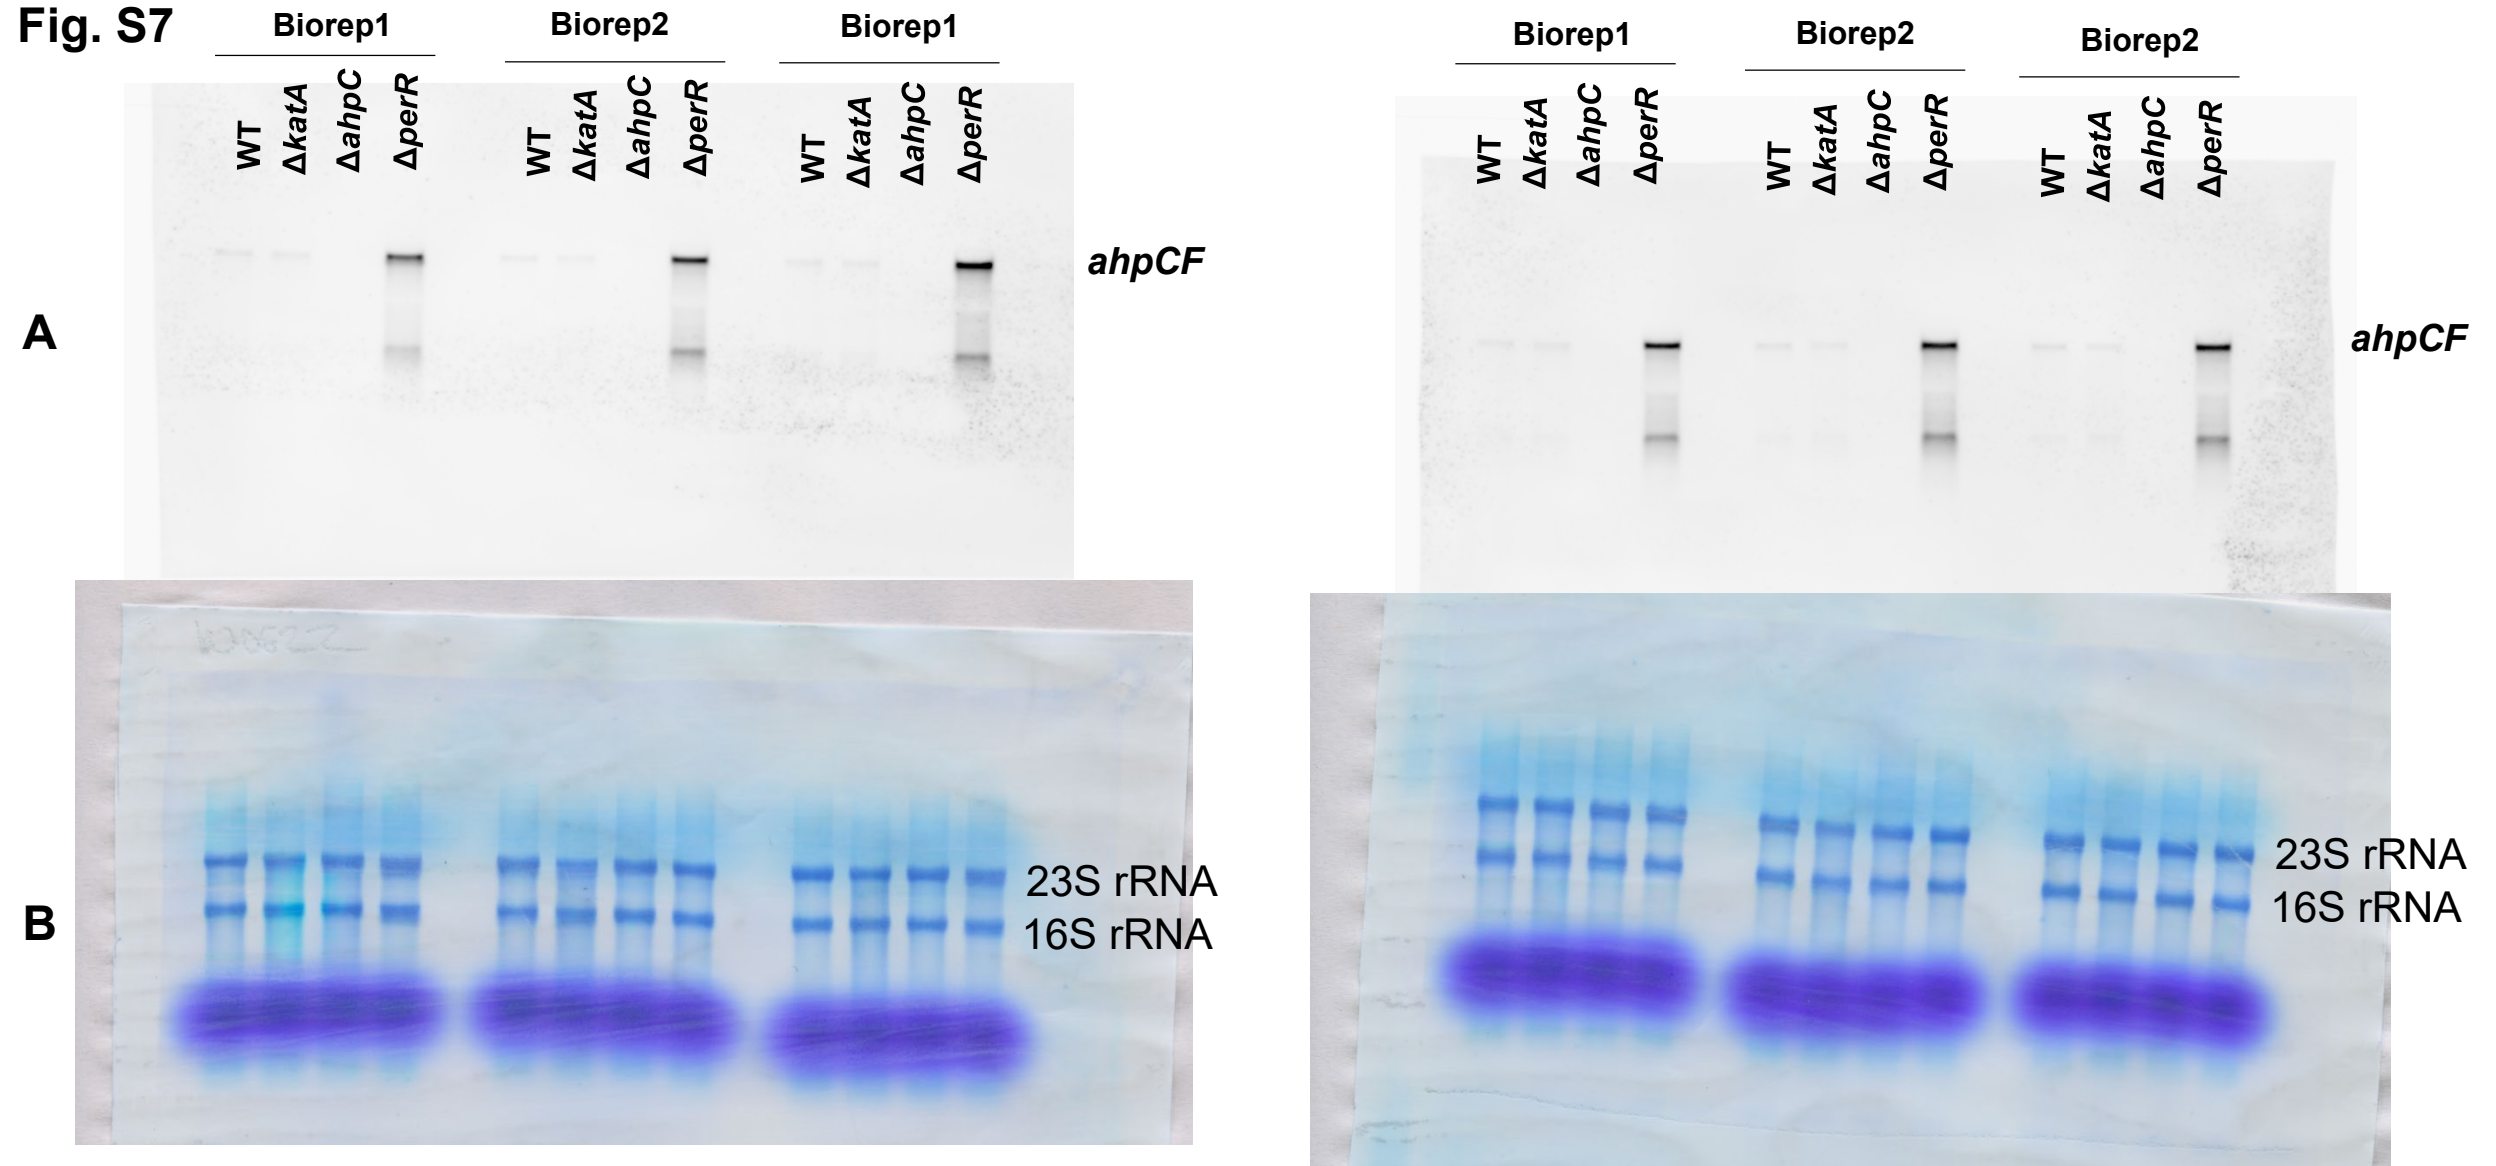

**Fig. S7. A)** The Northern blot images using the *ahpC* specific RNA probe show the *ahpCF* operon transcripts (images of Fig. 1H, 2 bioreplicates, 3 technical replicates). **B)** The methylene blue stain of the Northern blots used as loading control for total RNA (images of Fig. 1H, 2 bioreplicates, 3 technical replicates). Labelling of RNA samples is as above for the detection of the *ahpCF* transcript. The bands for the 16S and 23S rRNAs are indicated.



**Fig. S8**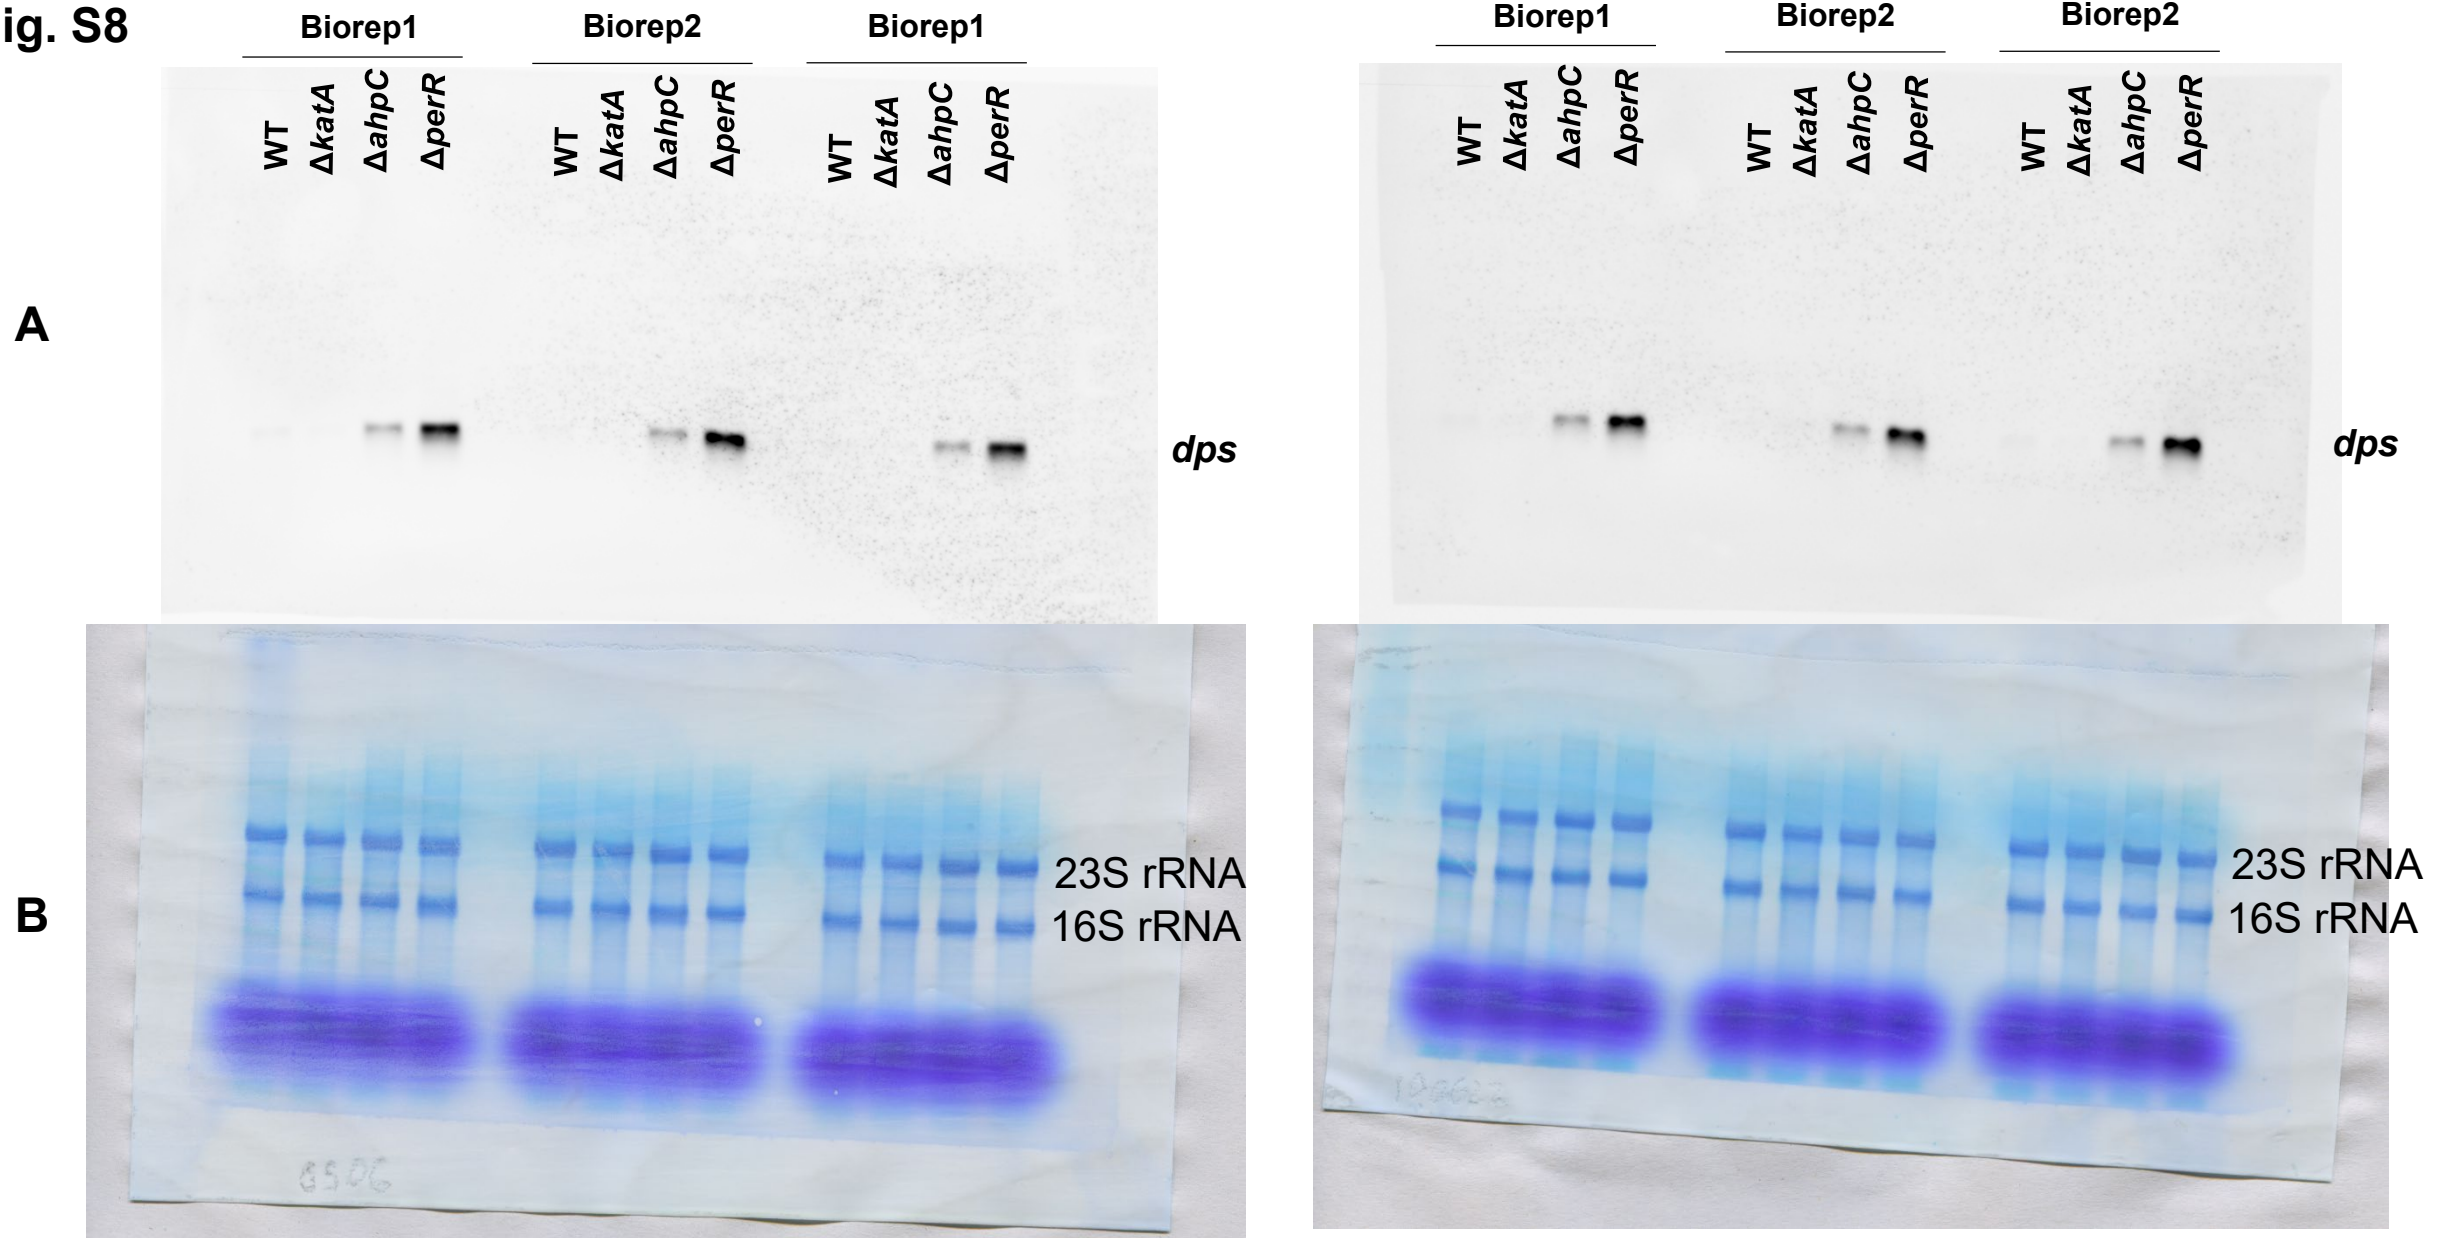

**Fig. S8. A)** The Northern blot images using the *dps* specific RNA probe show the *dps* transcripts (images of Fig. 1H, 2 bioreplicates, 3 technical replicates). **B)** The methylen blue stain of the Northern blots used as loading control for total RNA (images of Fig. 1H, 2 bioreplicates, 3 technical replicates). Labelling of RNA samples is as above for the detection of the *dps* transcript. The bands for the 16S and 23S rRNAs are indicated.



**Fig. S9**

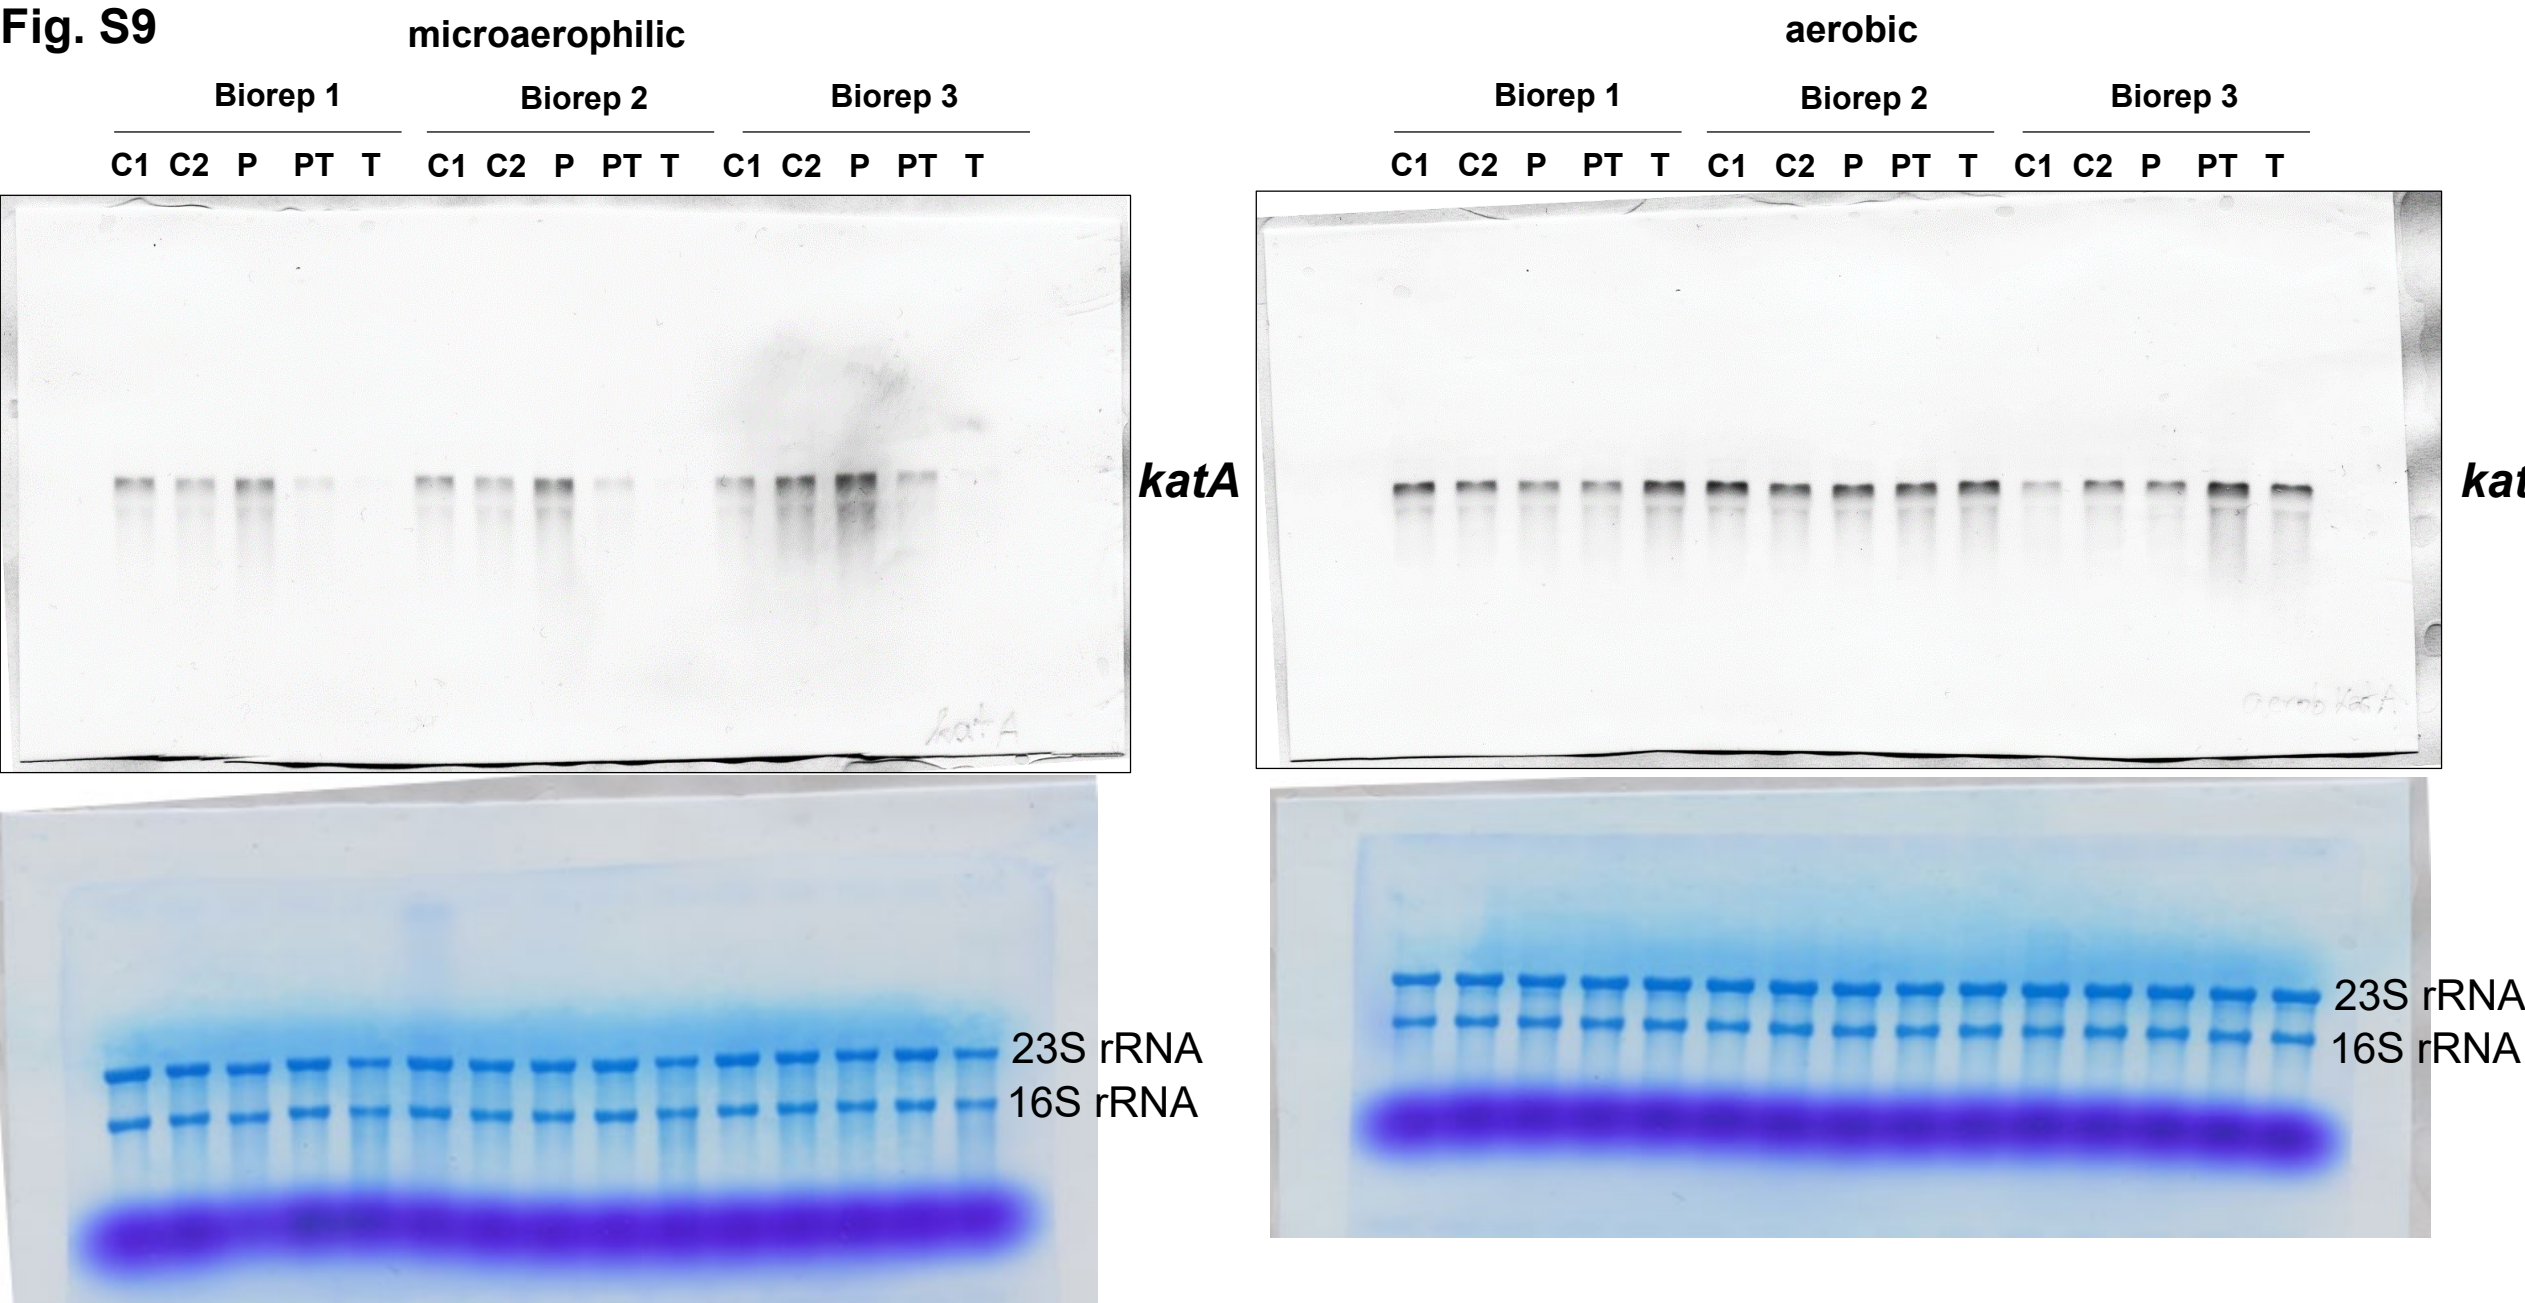

**Fig. S9. A)** The Northern blot images of priming experiments using the *katA* specific RNA probe show the *katA* transcripts (images of Fig. 5B,C, 3 bioreplicates). **B)** The methylen blue stain of the Northern blots used as loading control for total RNA (images of Fig. 5B,C; 3 bioreplicates). Labelling of RNA samples is as above for the detection of the *katA* transcript. The bands for the 16S and 23S rRNAs are indicated.



Fig. S10

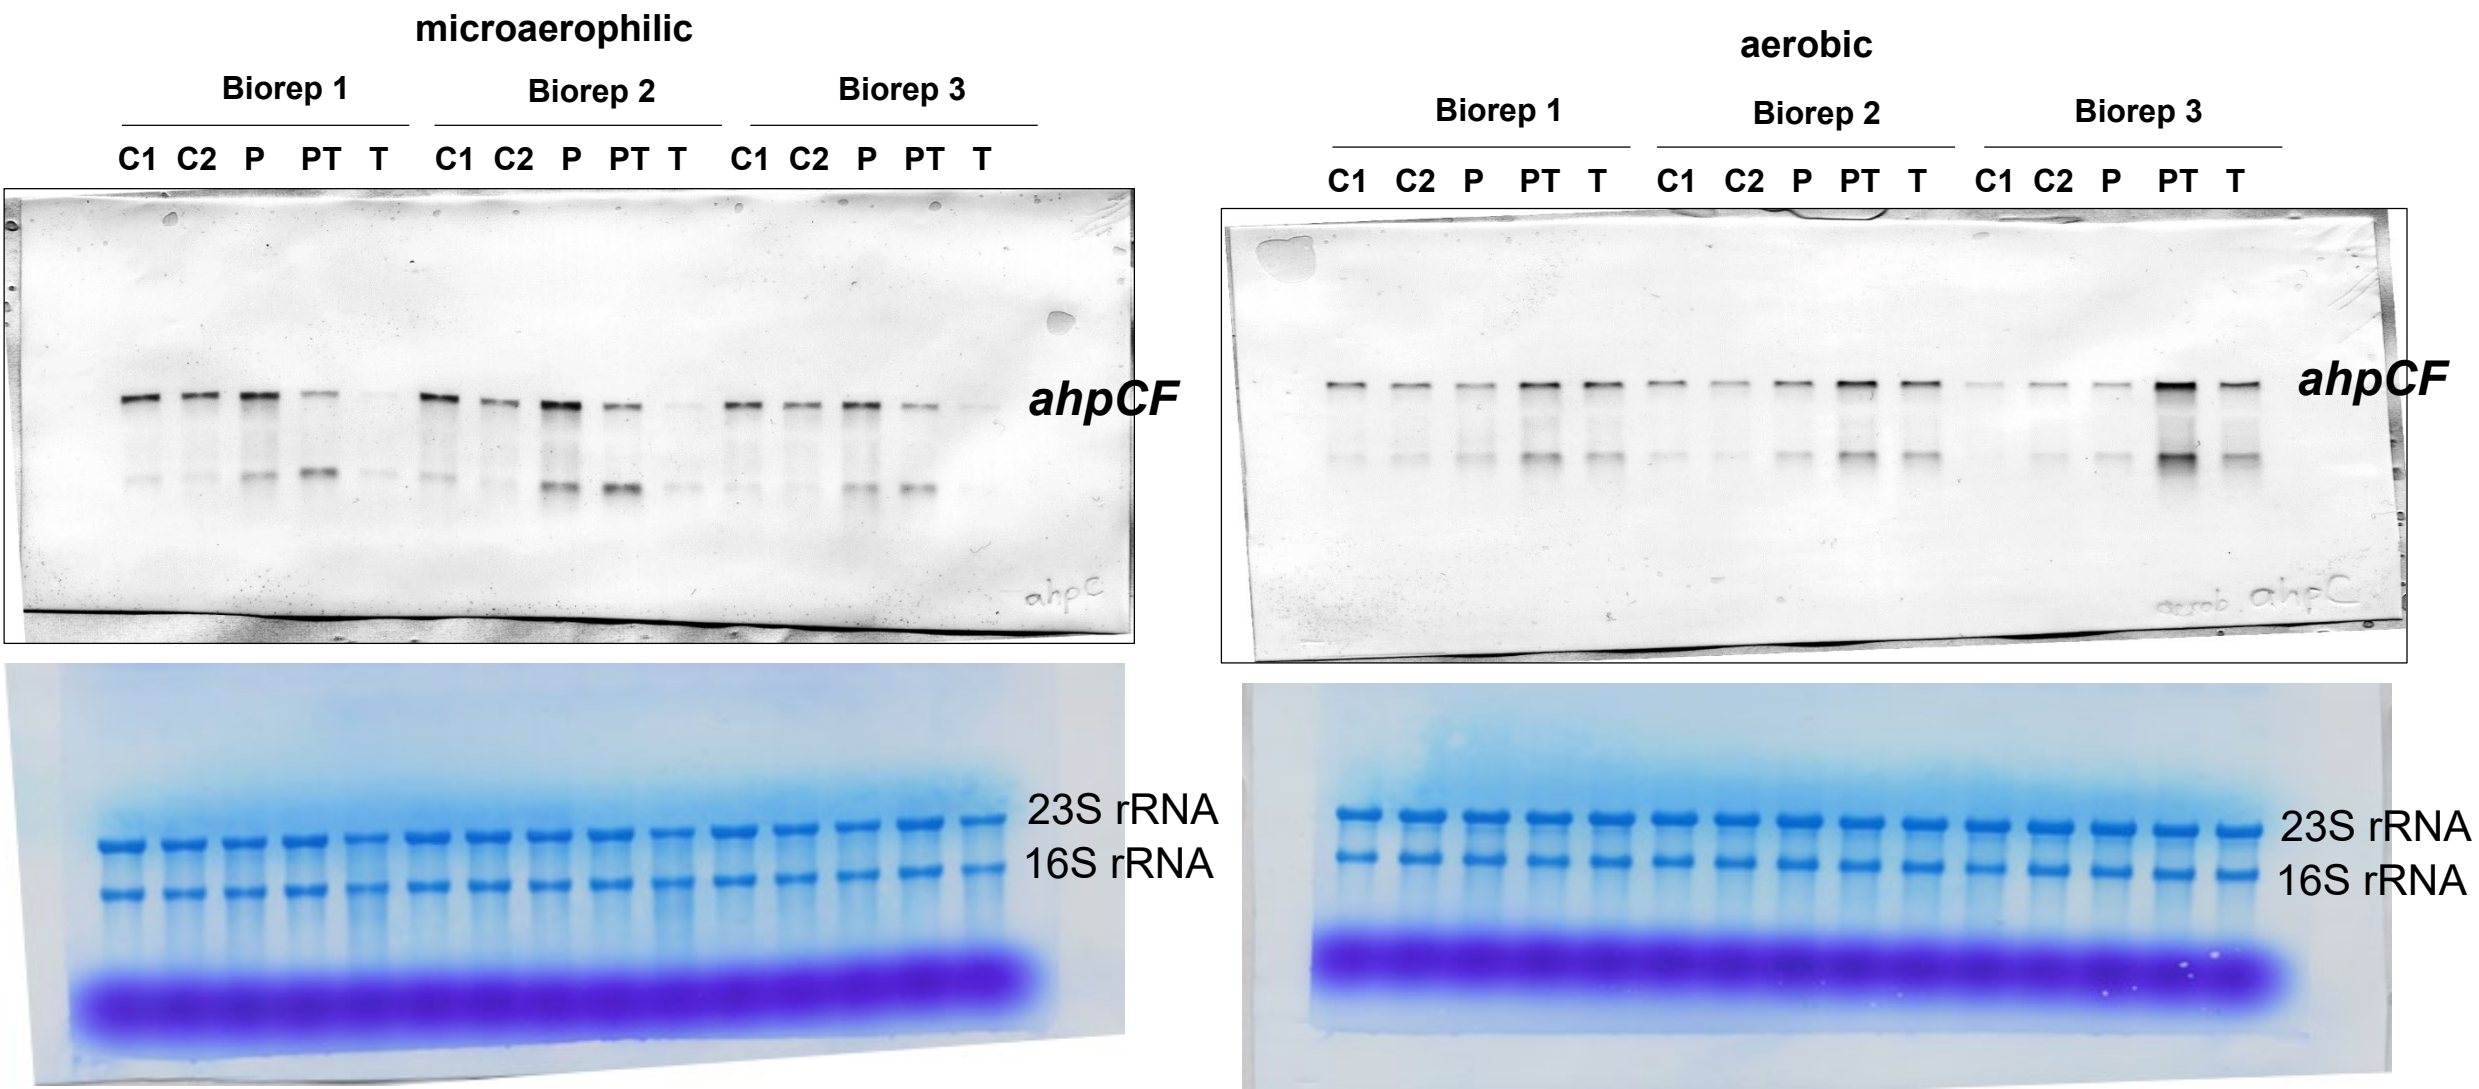

**Fig. S10. A)** The Northern blot images of priming experiments using the *ahpC* specific RNA probe show the *ahpCF* transcripts (images of Fig. 5B,C; 3 bioreplicates). **B)** The methylen blue stain of the Northern blots used as loading control for total RNA (images of Fig. 5B,C; 3 bioreplicates). Labelling of RNA samples is as above for the detection of the *ahpCF* transcript. The bands for the 16S and 23S rRNAs are indicated.



**Fig. S11**

**Biorep 1**

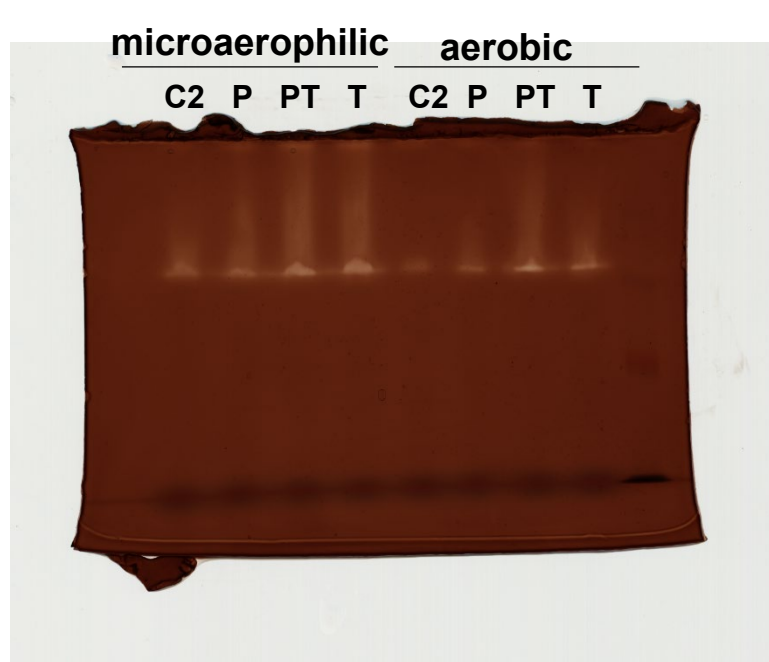

**Biorep 2**

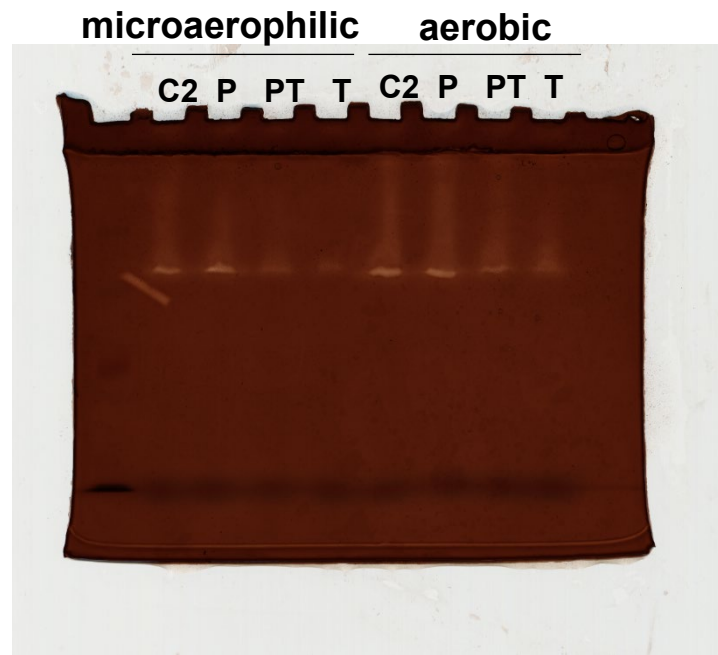

**Biorep 1**

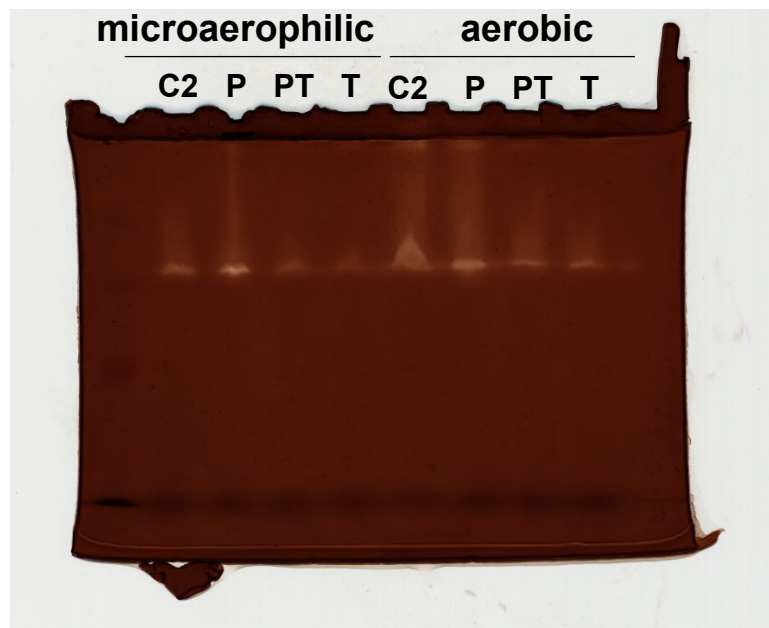

**Biorep 2**

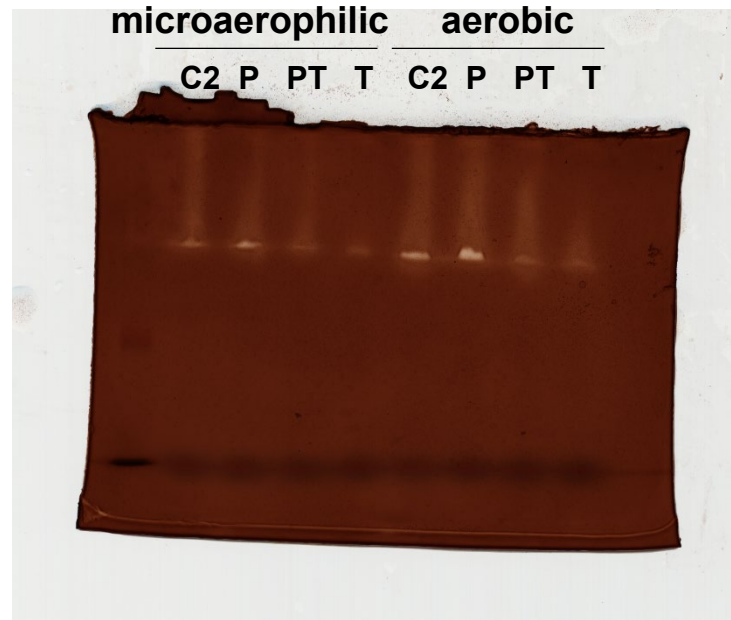

**Fig. S11.** Native gels of catalase stains used for KatA activity assays (images of Fig. 5F; 2 bioreplicates, 2 technical replicates)

Fig. S12

Biorep 1

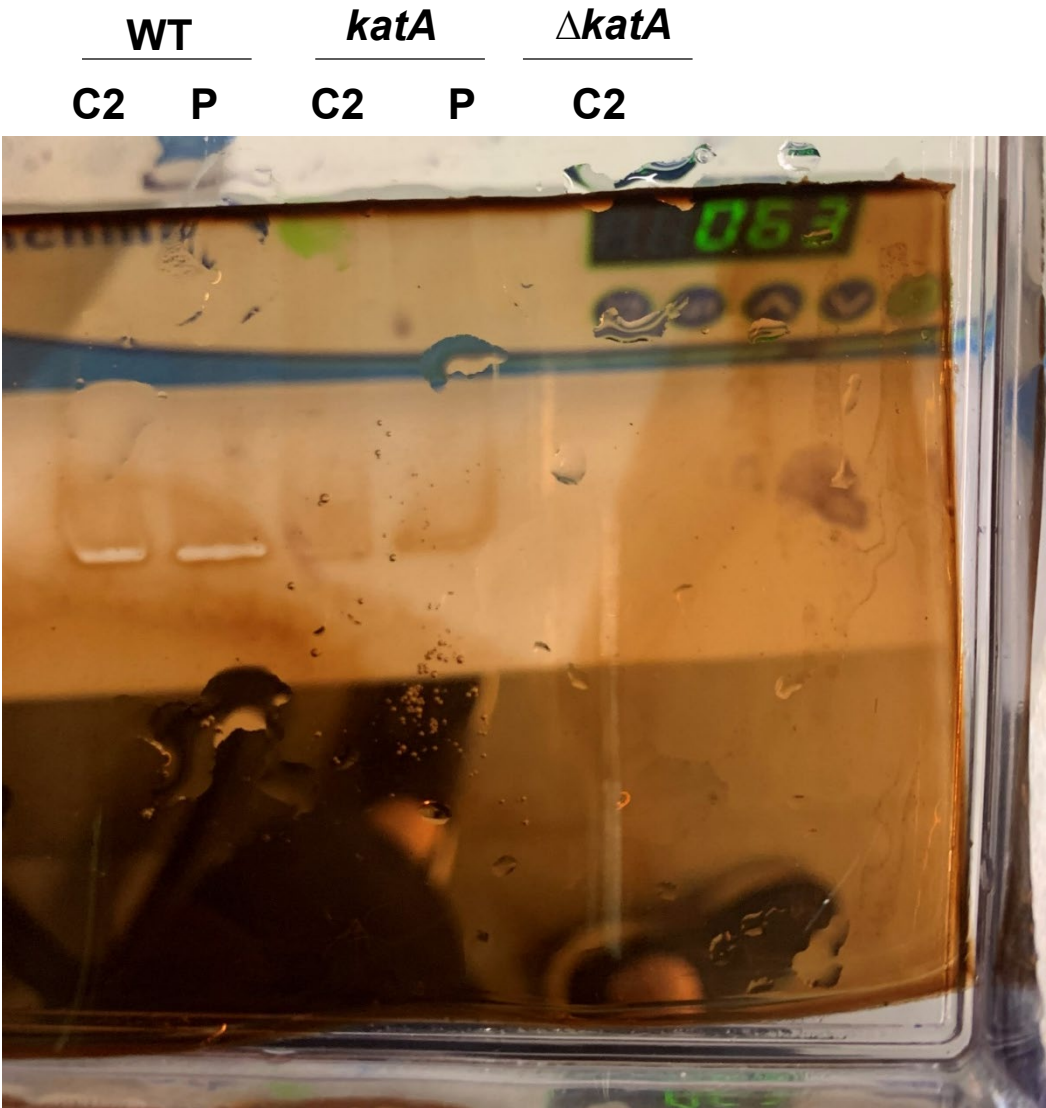

Biorep 2

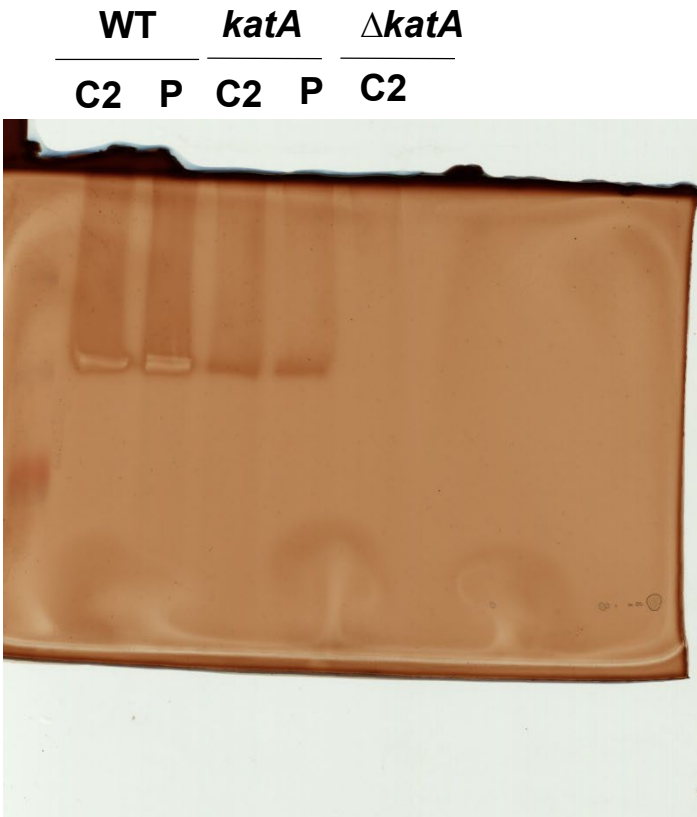

Biorep 3

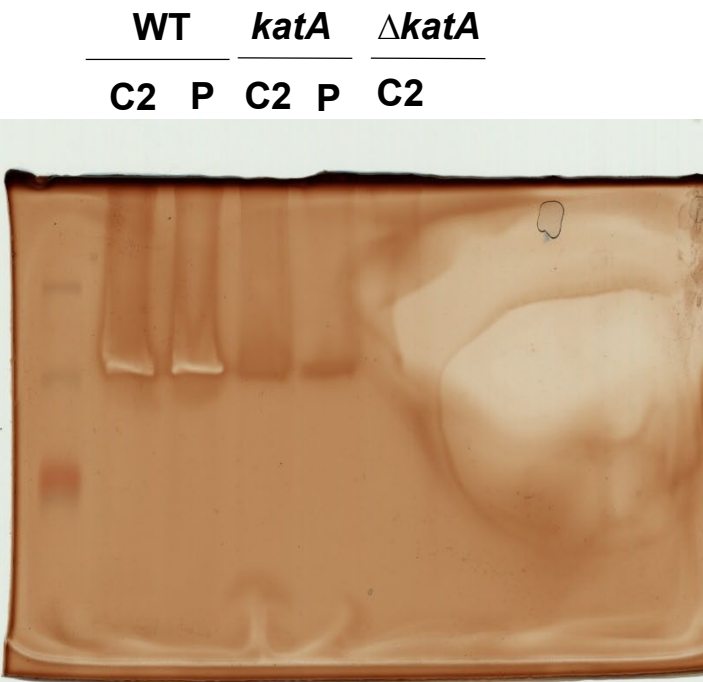

Fig. S12. Native gels of catalase stains used for KatA activity assays (images of Fig. S1D; 3 bioreplicates)

**Fig. S13**

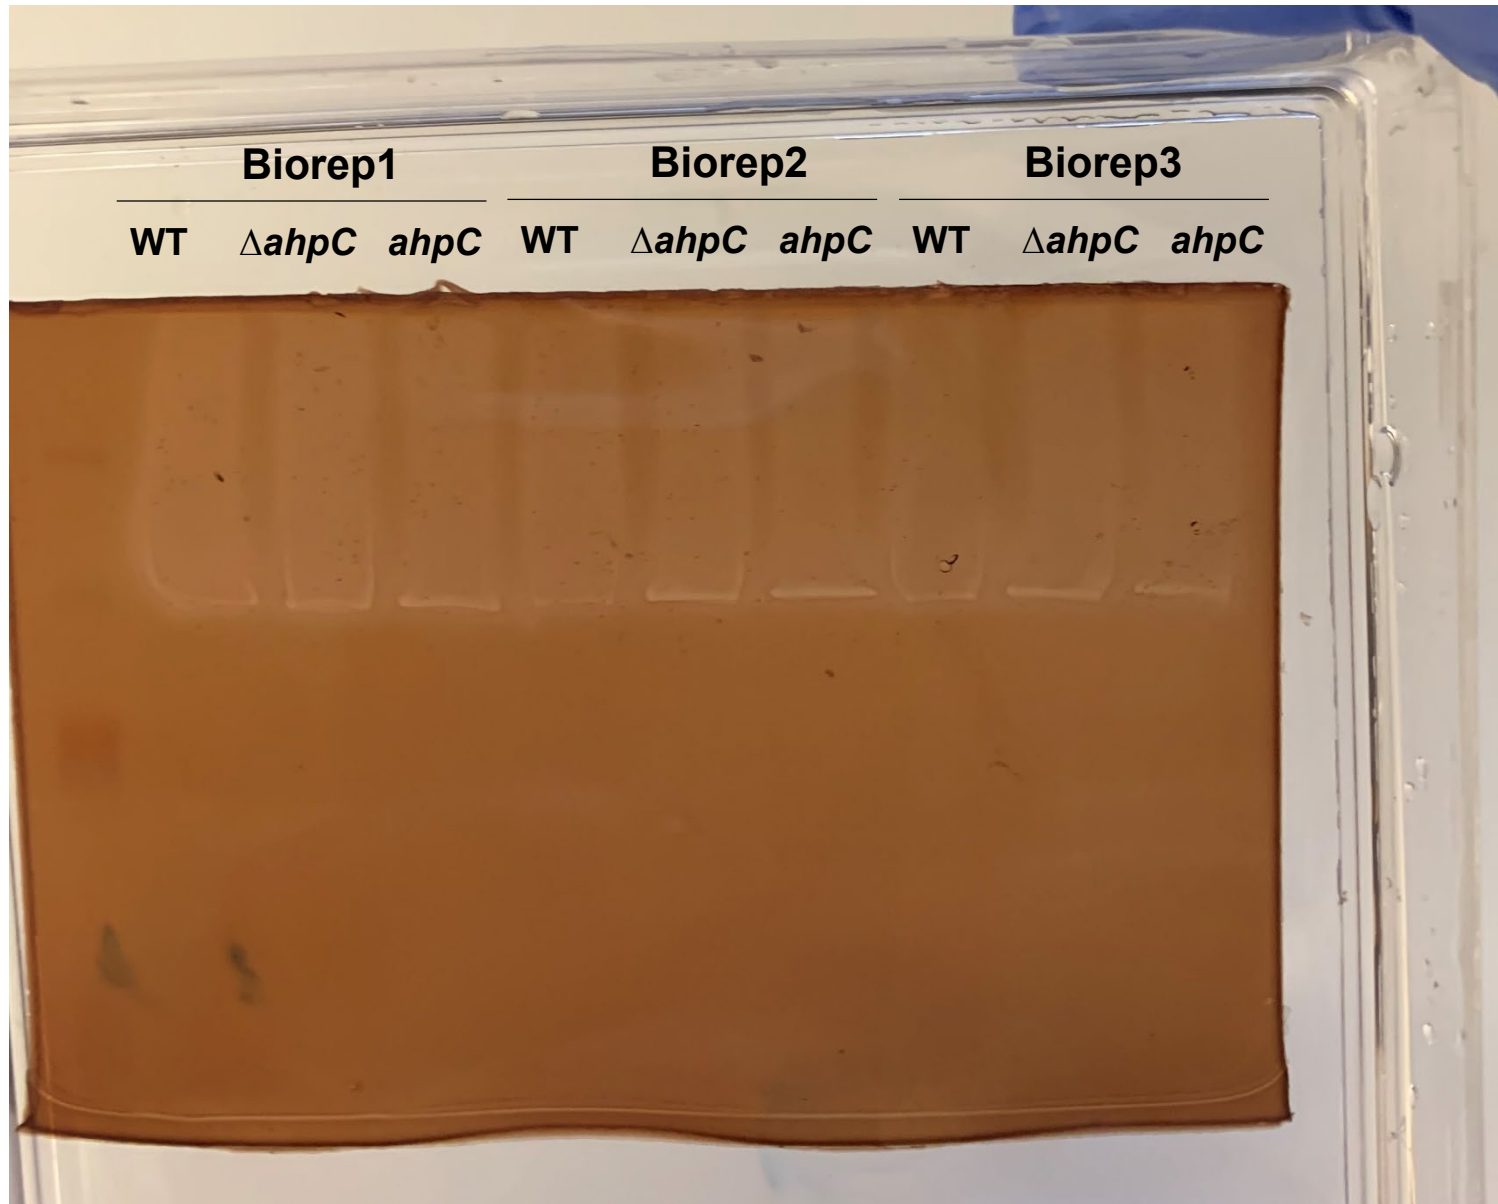

**Fig. S13.** Native gels of catalase stains used for KatA activity assays (images of Fig. S2B; 3 bioreplicates)
